1 Title page

2 **The ability of ddRAD-Seq to estimate genetic diversity and genetic introgression in endangered**

3 **native livestock**

4

5 **Ayumi Tezuka<sup>\*1</sup>, Masaki Takasu<sup>2</sup>, Teruaki Tozaki<sup>2,3</sup> and Atsushi J. Nagano<sup>1</sup>**

6 <sup>1</sup> Faculty of Agriculture, Ryukoku University, Yokatani 1-5, Seta Ohe-cho, Otsu, Shiga 520-2194, Japan

7 <sup>2</sup> Department of Veterinary Medicine, Faculty of Applied Biological Sciences, Gifu University, 1-1,

8 Yanagido, Gifu 501-1193, Japan

9 <sup>3</sup> Genetic Analysis Department, Laboratory of Racing Chemistry, 1731-2, Tsurutamachi, Utsunomiya,

10 Tochigi 320-0851, Japan

11 **\*Corresponding author: Ayumi Tezuka**, Faculty of Agriculture, Ryukoku University, Yokatani 1-5, Seta

12 Ohe-cho, Otsu, Shiga 520-2194, Japan, ayumi.tezuka@gmail.com

13

14 **Abstract**

15 Unplanned crossbreeding between a native livestock and a specific productive breed was one of the

16 main reasons that caused the loss of valuable genetic resources in native livestock. To avoid further loss

17 and damage of genetic resources in the native livestock, introgressed individuals should be distinguished

18 to eliminate them by preventing any further employment in future mating plans. In general, the genetic

19 diversity of native livestock had already decreased and mass elimination of introgressed individuals from

20 the population endangers their existence. To solve this problem, high-resolution markers are required to

21 discriminate between introgressed variation and native variation. Here, we applied ddRAD-Seq markers

22 for native Japanese horse “Taishu” that has undergone recent genetic introgression. Genome-wide

23 ddRAD-Seq markers can distinguish five breeds of native Japanese horses and Anglo-Arabian

24 introgressed breeds. We found the signatures of genetic introgression of Anglo-Arabian at only two  
25 chromosomes; however, the signatures were separated in their genome suggesting that it might not be the  
26 cause of recent introgression. The genetic diversity of Taishu was less than other Japanese breeds and the  
27 decreasing genetic diversity is an urgent issue compared to genetic introgression. Although few  
28 signatures of recent introgression were detected, a lot of shared SNPs (10% of all SNPs in Taishu) were  
29 detected between Taishu and Anglo-Arabian. To avoid misestimation of the presence and degree of  
30 introgression in native livestock, information regarding shared SNPs and population genetic approaches  
31 need to be assessed by using the large number of genome-wide markers such as ddRAD-Seq.

32

33 **Keywords**

34 **ddRAD-Seq, livestock, genetic introgression, genetic diversity**

## 35 **Introduction**

36 The diversity and populations of native livestock breeds have dramatically decreased due to the  
37 dominance of a few breeds that have been selected for greater productivity (Rischkowsky and Pilling,  
38 2007; Scherf and Pilling, 2015). Rapid and unplanned crossbreedings between native and productive  
39 breeds have frequently occurred, further depleting the valuable genetic resources of native livestock  
40 (Hanotte et al. 2010). To avoid further loss and damage to genetic resources of native livestock,  
41 introgressed individuals should be identified and removed. However, most endangered native livestock  
42 populations already have depleted genetic diversity, and the easy removal of introgressed individuals  
43 endangers their existence. Therefore, we should maintain a careful balance between preserving genetic  
44 diversity and removing genetic introgression by focusing at the genomic level (i.e., chromosomes and  
45 loci) to identify original genetic variations in native breeds and introgressed variations from other breeds.  
46 This could then be used to maintain the genetic diversity of native variants and eliminate the introgressed  
47 variants.

48  
49 Genetic introgression is the movement of genes from one species into the genome of another via crossing.  
50 Therefore, genetic introgression can be difficult to detect without molecular data (Fitzpatrick et al. 2010;  
51 Ryan et al. 2009). The development of the Sanger-PCR methods has enabled estimates of genetic  
52 introgression using partial DNA sequences, such as mtDNA sequences and single sequence repeat (SSR)  
53 markers. However, detecting genetic introgression using partial DNA has some problems. For example,  
54 mtDNA is maternally inherited and does not recombine, so it can only be used to detect genetic  
55 introgression through females and cannot reflect the degree of genetic introgression. Meanwhile, SSR  
56 markers are usually no more than several hundred loci and incur the possibility of overestimating or  
57 underestimating genetic introgression. As genetic introgression has progressed for several generations, a

58 larger number of markers is needed to accurately reflect the degree of introgression in individuals.  
59 Furthermore, individuals can be identified as hybrids from only a few markers even if there is little  
60 introgressed variation in other regions. This can have a fatal effect on the conservation of native breeds  
61 because the few-introgressed individuals who carry native variations could be eliminated from the  
62 population, causing further decline in genetic diversity.

63 Endangered native livestock often have two problems: reduced genetic diversity and genetic  
64 introgression from other breeds. Removing genetic variation that has been introgressed from other breeds  
65 simultaneously removes the genetic variation of the native breed, further depleting the genetic diversity of  
66 native livestock breeds. Therefore, genome-wide, high-resolution markers are needed to achieve a suitable  
67 balance between removing the introgressed genetic variations and retaining the genetic diversity of native  
68 livestock.

69  
70 Double-digested restriction site-associated DNA sequencing (ddRAD-Seq) is used to obtain thousands of  
71 single nucleotide polymorphisms (SNPs) across the genome (Baird et al. 2008; Peterson et al. 2012). To  
72 detect genome-wide SNPs, various molecular methods have been used to generate libraries for use in  
73 next-generation sequencing (Futschik and Schlotterer, 2010; Mardis, 2008; Nielsen et al. 2011). One  
74 effective method is ddRAD-Seq, a variation of genotyping-by-sequencing (GBS) (Poland and Rife, 2012).  
75 In this strategy, genomic DNA is fragmented using restriction enzymes and sequenced using  
76 next-generation sequencing technologies to obtain SNPs that are located next to target restriction sites. As  
77 there are far fewer sequences, this strategy increases the coverage of fragments and provides reliable data  
78 for many samples. There are some favorable aspects for applying ddRAD-seq to endangered native  
79 livestock. For example, ddRAD-seq can be applied to all target species and is cost-effective compared to  
80 whole-genome sequencing and SNP chips. Although SNP chips designed for some livestock can provide

81 tens of thousands of accurate SNPs, it is possible that the SNPs do not include those of native livestock.  
82 Also, SNP chips are not readily available for some native livestock, whereas ddRAD-seq can be applied to  
83 almost all native livestock without additional experiments. Thus, it is clear that ddRAD-Seq is useful for  
84 detecting the genetic introgression of native livestock and is a versatile method for genetic introgression  
85 problems for many native livestock.

86

87 ddRAD-Seq has often been used to detect genetic introgression and hybridization in wild species  
88 (Chattopadhyay et al. 2016; Combosch and Vollmer, 2015). Most of the previous studies aimed at finding  
89 the geographical hybrid zone and detect signatures of hybridization and backcrossing between target  
90 species. In contrast, ddRAD-seq approaches for endangered native livestock aimed to identify introgressed  
91 individuals and decide whether the individuals were needed to be included in the conservation plan. As  
92 native livestock breeds have lower genetic diversity compared to wild species, introgressed loci and regions  
93 should be identified using high-resolution markers to create sustainable conservation plans. Here, we  
94 confirmed the ability of ddRAD-Seq to identify introgression variations with high resolution.

95

96 In this study, we examined native Japanese horse breeds on Tsushima-island in Nagasaki prefecture,  
97 Japan. The breed Taishu is listed by the FAO as “critical maintained” (Rischkowsky and Pilling, 2007;  
98 Scherf and Pilling, 2015). Taishu was introgressed with the Anglo-Arabian breed for military use during  
99 World war II (Hayashida, 1972). There is documented evidence of this genetic introgression, which  
100 describes one main event of crossing between these two breeds (Hayashida, 1972). This single  
101 introgression of Taishu presents a good opportunity to estimate genetic diversity and genetic introgression  
102 in native livestock using ddRAD-Seq. In addition, mtDNA sequences, SSR markers, and SNP chips for  
103 horse (*Equus*) are available. SNP chips for horse can produce 54 000 and 670 000 SNPs (McCue et al.

104 2012; Schaefer et al. 2017). Some studies used these methods in some native Japanese horses. Therefore,  
105 we can compare the results of our ddRAD-Seq with those from previous studies. We obtained about 10 000  
106 SNPs by ddRAD-seq and identified genetic introgression and native loci on each chromosome in Taishu  
107 breed. We demonstrate the utility of ddRAD-Seq for the conservation of endangered native livestock  
108 breeds.

109

## 110 **Material and methods**

### 111 **Sample collection and DNA extraction**

112 We collected fresh blood samples from 57 individuals of 5 different breeds of Japanese native horse  
113 (*Equus caballus*), Taishu (N = 38), Kiso (N = 5), Miyako (N = 9), Yonaguni (N = 5), and Hokkaido (N = 6)  
114 in Japan. There are records that Taishu, Kiso, and Hokkaido were introgressed with European breeds,  
115 whereas Miyako and Yonaguni are not introgressed. Taishu is genetically closer to the Kiso-Hokkaido  
116 clade than to the Miyako-Yonaguni clade (Tozaki et al. 2003). In addition, blood samples from the  
117 Anglo-Arabian breed (N = 5) that was introgressed into Taishu, were provided by Goryo Bokujo (Imperial  
118 Stock Farm). None of these breeds have genetic crossing between them at present. The blood samples were  
119 collected in a tube with EDTA and kept at  $-20^{\circ}\text{C}$  until DNA extraction. Total genomic DNA was  
120 extracted from the whole blood using the Maxwell 16 Blood DNA Purification Kit (Promega, USA).

121

### 122 **DNA sequencing of mtDNA**

123 16S rRNA sequences of mtDNA were amplified using primers designed by Achilli et al. (2012). All  
124 amplifications followed PCR protocols for a reaction volume of 10  $\mu\text{l}$ : 100 ng of the DNA template, 5.0  $\mu\text{l}$   
125  $2\times$  KAPA, and 0.2  $\mu\text{M}$  each primer. The amplification conditions were as follows: 2 min at  $98^{\circ}\text{C}$ ; then 30  
126 cycles of 30 s at  $98^{\circ}\text{C}$ , 30 s at  $66^{\circ}\text{C}$ , and 1.5 min at  $72^{\circ}\text{C}$ ; ending with 15 min at  $72^{\circ}\text{C}$ . The PCR

127 products were purified and cleaned using ExoSAP-IT Express PCR Product Clean-UP (Affymetrix).  
128 Sequencing was performed by Macrogen (Seoul, Korea). Sequencing was performed using nested primers  
129 as designed by Achilli et al. 2012. The obtained sequences were aligned using Clustal X software (Larkin  
130 et al. 2007).

131

### 132 **Library preparation and sequencing in ddRAD-Seq**

133 Library preparation was composed of 5 steps. First, restriction enzyme digestion and adapter ligation  
134 were performed in 10  $\mu$ L reaction mix: 2  $\mu$ L sample DNA (20 ng/ $\mu$ L), 0.5  $\mu$ L EcoRI (10 U/ $\mu$ L, Takara,  
135 Osaka, Japan), 0.5  $\mu$ L BglII (10 U/ $\mu$ L, Takara), 1  $\mu$ L 10x NEB buffer 2 (New England Biolabs, Ipswich,  
136 MA, USA), 0.1  $\mu$ L 100x BSA (Takara), 0.4  $\mu$ L EcoRI adaptor (5  $\mu$ M), 0.4  $\mu$ L BglII adaptor (5  $\mu$ M), 0.1  
137  $\mu$ L ATP (100 mM), 0.5  $\mu$ L T4 DNA Ligase (600 U/ $\mu$ L, Enzymatics, Beverly, MA, USA) and 4.5  $\mu$ L  
138 nuclease-free water. The digestion and ligation were performed at 37 °C for 16 h.

139

140 The two Y-shape adapters were prepared by annealing two partially complementary oligo-DNAs. A  
141 mixture of 100  $\mu$ M adapter F and R was annealed using a thermal cycler with the following program: 95 °C  
142 for 2 min, slow-cooled to 25 °C (0.1 °C/s), followed by 30 min at 25 °C. The annealed adapter (50  $\mu$ M)  
143 was stored at -20 °C. It was diluted to the working concentration (0.4  $\mu$ M) just before use. The  
144 oligonucleotide sequences of the Y-shaped adaptors were as follows: BglII\_adaptor\_F: 5'-A\*A\*T GAT  
145 ACG GCG ACC ACC GAG ATC TAC ACT CTT TCC CTA CAC GAC GCT CTT\* C\*C-3';  
146 BglII\_adaptor\_R: 5'-G\*A\*T CGG AAG AGC TGT GCA GA\*C\* T-3'; EcoRI\_adaptor\_F: 5'-/Phos/  
147 A\*A\*TTGAGATCGGAAGAGCACACGTCTGAACTCCAGTC\*A\*C -3'; and EcoRI\_adaptor\_R:  
148 5'-G\*T\*C AAG TTT CAC AGC TCT TCC GAT C\*T\*C-3', where \*signifies a phosphorothioate bond and  
149 "/Phos/" signifies a phosphorylation.

150

151 The ligation product was purified using AMPure XP beads (Beckman Coulter, Brea, CA, USA) as  
152 follows: 10  $\mu$ L of the AMPure XP and 10  $\mu$ L ligation product were mixed by pipetting and kept at 25  $^{\circ}$ C.  
153 for 5 min. The purification was performed according to the manufacturer's instructions. Then, the purified  
154 adaptor-ligated DNA was subsequently amplified by PCR. Amplification was performed in 10  $\mu$ L  
155 reactions: 2  $\mu$ L DNA, 2  $\mu$ L Index primer (5  $\mu$ M), 1  $\mu$ L TruSeq\_Univ\_primer (10  $\mu$ M), 5  $\mu$ L 2X KAPA  
156 HiFi HS ReadyMix (KAPA Biosystems). The PCR was executed with 94  $^{\circ}$ C for 2 min and 20 cycles of  
157 98  $^{\circ}$ C for 10 s, 65  $^{\circ}$ C for 15 s, and 68  $^{\circ}$ C for 15 s. After PCR, the product was preserved at 4  $^{\circ}$ C. The  
158 oligonucleotide sequences of the primers were as follows: TruSeq\_Univ\_primer: 5'-AAT GAT ACG GCG  
159 ACC ACC GAG ATC TAC ACT CTT TCC CTA CAC GA-3'; and Index primer: 5'-CAA GCA GAA  
160 GAC GGC ATA CGA GAT XXX XXX GTG ACT GGA GTT CAG ACG TGT-3', where "XXXXXX"  
161 signifies an index sequence.

162

163 The PCR products of all samples were combined and concentrated using AMPure XP beads. The combined  
164 PCR product was mixed with equal volume of AMPure XP. Then, the mixture was placed on a magnet, and  
165 after 5 min its supernatant was removed. The remained beads were washed by adding 75% EtOH in excess  
166 volume than the mixture and removing the supernatant after 30 s; this was repeated twice on the magnet.  
167 After addition of 50  $\mu$ L nuclease-free water, the beads were resuspended by pipetting and kept at 25  $^{\circ}$ C. for  
168 1 min. The concentrated DNA was obtained by collecting the supernatant. The concentrated DNA was  
169 purified by size selection using E-Gel SizeSelect 2% agarose (Life Technologies, Carlsbad, CA, USA).  
170 Approximately 350 bp fragments were retrieved; their concentration was measured using a QuantiFluor  
171 dsDNA System (Promega, Madison, WI, USA), and the quality was measured with a Bioanalyzer DNA HS  
172 kit (Agilent Technologies, Santa Clara, CA, USA). After preparation of the library, 50-bp sequences of the



173 *Bgl*III digested side of the DNA fragments were read using a HiSeq2000 and Hiseq2500 (Illumina, San  
174 Diego, CA, USA) by Macrogen. The sequenced reads were demultiplexed by CASAVA 1.8.2 (Illumina).  
175 Fastq files were deposited into the DNA Data Bank of Japan Sequence Read Archive as accession no.  
176 DRA007047.

177

## 178 **SNP calling**

179 After removing the reads that contained low-quality bases and adapter sequences from the raw sequence  
180 reads using Trimmomatic ver. 0.33 (Bolger et al. 2014), SNPs were called with Stacks ver. 1.37 (Catchen  
181 et al. 2013). This process was performed with the default settings of the pipeline *ref\_map.pl* in Stacks  
182 (population analysis, -m 3 -M 2 -n 1). We then generated an HTML report using a program *Stacks binder*  
183 (Yasugi et al. 2018) to visually check the summary of the ddRAD-Seq library and the results of SNP  
184 calling (Supplemental Material S1).

185

## 186 **Genome-wide locus-based phylogeny**

187 We also reconstructed the phylogeny of the genome-wide ddRAD-Seq data set in RAxML (Stamatakis,  
188 2014). We used the GAMMA+P-Invar model of sequence evolution and performed a single full maximum  
189 likelihood tree search. We applied that the rapid bootstrap algorithm with 1000 replicates to each data set.  
190 The resultant tree was plotted using Figtree (<http://tree.bio.ed.ac.uk/software/figtree/>).

191

## 192 **Mitochondrial DNA-based phylogeny**

193 We aligned 1828 bp in lengths, including 16S rRNA sequences of 53 samples, and reconstructed the  
194 phylogeny of 16S rRNA sequences using maximum likelihood in RAxML, version 8.2.7 (Stamatakis,  
195 2014). We used the GAMMA+P-Invar model of sequence evolution and performed a single full maximum

196 likelihood tree search. We applied the rapid bootstrap algorithm with 1000 replicates to each dataset. The  
197 resultant tree was plotted using Figtree (<http://tree.bio.ed.ac.uk/software/figtree/>).

198

### 199 **Test of genetic introgression using allele frequency data**

200 We analyzed 9 609 SNPs using TreeMix ver. 1.12 software (Pickrell and Pritchard, 2012), which were  
201 used to infer population history, including divergence and gene flow, using allele frequency data under  
202 genetic drift. TreeMix showed the maximum-likelihood tree with estimated hybridization events, including  
203 the direction of gene flow. We ran TreeMix with 0 and 1 migration events from Anglo-Arabian breeds to  
204 Taishu breed with various migration rates.

205

206 We used a model-based clustering approach in STRUCTURE (Pritchard et al. 2000) to identify genetic  
207 clusters within Japanese native horses and to investigate the degree of genetic introgression at individual  
208 level. We ran STRUCTURE from  $K = 1$  to 6, with 10 iterations per  $K$  by using all individual data. Then,  
209 we ran STRUCTURE from  $K = 1$  to 3, with 10 iterations per  $K$  by using data of Anglo-Arabian individuals  
210 and Taishu individuals. Each iteration included a burn-in of 50 000 generations, followed by MCMC for  
211 100 000 generations. We obtained the optimal  $K$  using methods in Evanno et al. (2005) (EVANNO et al.  
212 2005) the STRUCTURE harvester (Earl and vonHoldt, 2012). We plotted the results using STRUCTURE  
213 PLOT version 2.0 (Ramasamy et al. 2014).

214

215 To test if variations shared SNPs, the Taishu and Anglo-Arabian breeds could be explained by genetic  
216 introgression, rather than ancestral variation, we performed ABBA/BABA tests by calculating D-statistics  
217 and Z-scores. This measured the signatures of alternative phylogenetic asymmetry and the proportion of the  
218 genome that was shared between the two breeds due to genetic introgression. We defined 1 of the 4

219 Japanese native breeds and Taishu as sister clades. “Anglo-Arabian” and “Thoroughbred” were assumed as  
220 the introgression breed and the outgroup breed, respectively. For the test, we used the “CalcD” and  
221 “WinCalcD” functions in the “evobiR” R package (Blackmon et al. 2013), with 1000 replicates for each  
222 individual test and 100 replicates for each chromosome and regions to estimate variance.

223

#### 224 **Linkage disequilibrium in Taishu populations**

225 Before detecting regions of high linkage disequilibrium (LD) in the Taishu breed, we conducted  
226 phasing of genotype data and imputation of missing data using Beagle ver. 5 (B. L. Browning and S. R.  
227 Browning, 2016). We used the phased data with Haploview software ver 4.2 (Barrett, 2009) to calculate  
228 pairwise measures of LD among SNPs on the same chromosomes. Using the default method, we divided  
229 the region into blocks of strong LD using a standard block definition based on confidence intervals for  
230 strong LD (Gabriel et al. 2002) and minor allele frequencies  $> 0.05$ . If the haploblock size was  $> 10$  kb,  
231 we defined the regions with variations shared between Taishu and Anglo-Arabian as potentially  
232 introgressed variation.

## 233 **Results**

### 234 **SNPs detection in the native Japanese horse**

235 We obtained 312 035 915 sequence reads after removing undesirable reads. The median read number per  
236 sample was 4 588 763 (interquartile range: 2 747 437–6 587 774). The median average quality value per  
237 sample was 37.465 (interquartile range: 36.77–37.63). RAD-seq library summary is reported in  
238 Supplemental Material S1. From these reads, Stacks was used to build 1 363 411 loci that contained 0 or  
239 more than 1 SNP. Supplemental Material S1a and A.1b show the number of loci shared by individuals. The  
240 number of loci decreased as the number of matching samples increased, with or without SNPs. All  
241 information regarding the reads used in Stacks, including that described above, is given in Supplemental  
242 Material S1a. We used 9 609 SNPs for analysis, filtered using the criteria over 75% matching samples, 1  
243 SNP, 2 alleles, cut off 0.05% minor alleles, and mapped them to the chromosomes.

244

### 245 **Genetic introgression at the population level - Maximum Likelihood phylogenies of 5 native** 246 **Japanese breeds and Anglo-Arabian -**

247 To confirm admixture between Anglo-Arabian population and Taishu population, we reconstructed the  
248 ML phylogeny using 9 609 SNPs. The phylogeny showed that each breed consisted of a single clade (Fig.  
249 1). All individuals of Taishu were grouped in a single clade and separated from all individuals of  
250 Anglo-Arabian. Some population structure was detected in the Taishu clade and the genetic distances  
251 between Taishu subpopulations were relatively large, but the genetic distances in both subpopulations of  
252 Taishu and Anglo-Arabian were large. We sequenced 1829 mtDNA sequences, including 16S rRNA that  
253 have slowest evolutionary rate of the present *Equidae* (Achilli et al. 2012). We detected 8 SNPs in 16S  
254 rRNA of mtDNA. The phylogeny constructed using mtDNA did not show the pattern of breeds  
255 (Supplemental Material S2.).

256

257 **Genetic introgression at the population level - TreeMix analysis -**

258 To estimate a migration rate of the genetic introgression from Anglo-Arabian into Taishu, the TreeMix  
259 approach was applied to all 6 breeds. A tree with 0 edges (i.e., no introgression event) explained 98.55% of  
260 the variance in relatedness between breeds (Fig. 2a). When a 4% migration edge was allowed from  
261 Anglo-Arabian into Taishu, the variance in relatedness between breeds was explained by the model that  
262 reached 98.80 %, which was the best-explained migration weight at an introgression from Anglo-Arabian  
263 to Taishu (Fig. 2b), based on the assumption that migration did not dramatically improve the variance in  
264 relatedness of the tree.

265

266 **Genetic introgression at the individual level - STRUCTURE analysis -**

267 To estimate the degree of genetic introgression from Anglo-Arabian individuals to Taishu at individual  
268 level, we used 9609 loci with 1 SNP and 2 alleles in the STRUCTURE analysis. When we used genomic  
269 data from all individuals, based on  $\ln P(K)$  and delta K (EVANNO et al. 2005), we determined that the  
270 optimal value of K was 2 (Fig. 3a). One cluster included Taishu, another included Miyako and Yonaguni.  
271 Kiso, Hokkaido, and Anglo-Arabian consisted of 1/3 Taishu cluster and 2/3 Miyako-Yonaguni cluster.  
272 When K = 5 and 6, results showed an Anglo-Arabian cluster, and that all breeds were grouped individually;  
273 however, some Taishu were partially included in the same cluster as Anglo-Arabian. Then, we conducted  
274 additional structure analysis using genomic data from only Taishu and Anglo-Arabian. Based on  $\ln P(K)$   
275 and delta K (EVANNO et al. 2005), we determined that the optimal value of K was 2 (Fig. 3b). When K =  
276 3, results showed an Anglo-Arabian cluster. In both analyses, we observed 10 individuals who comprised  
277 0.1–10 % of the Anglo-Arabian cluster. However, this degree comprising Anglo-Arabian cluster was  
278 detected in all 5 Japanese native breeds (Fig. 3a and Fig. 3b).

279

280 **Genetic introgression at the individual level - ABBA/BABA tests for each Taishu individuals**

281 -

282 To confirm that the genetic introgression from Anglo-Arabian to Taishu is more often than in other  
283 native Japanese breeds, we conducted four ABBA/BABA tests for all Taishu individuals (Fig. 4 and  
284 Supplemental Material S6). The ABBA/BABA test calculates the proportion of ABBA and BABA patterns.  
285 An excess of any of these patterns indicates the genetic introgression that can be detected using Patterson's  
286 D statistic (Green et al. 2010). If D is significantly different from 0, then the null hypothesis of no genetic  
287 introgression is rejected. When using the SNPs of Taishu and 3 of the native Japanese breeds, without  
288 Yonaguni as a sister species, almost all individuals had negative Patterson's D. Thus, the genetic  
289 introgression from Anglo-Arabian to Taishu did not occur as often as it did in the other 3 breeds. On the  
290 other hand, genetic migration from Anglo-Arabian into Taishu occurred more often than that into Yonaguni.  
291 If genetic introgression from Anglo-Arabian into Taishu during WWII has left a signature in Taishu  
292 individuals, then Patterson's D should be positive when using SNPs of both Miyako and Yonaguni as  
293 non-introgressed breeds.

294

295 **Genetic introgression at chromosomal and regional levels - ABBA/BABA tests for each**

296 **chromosome -**

297 After a genetic introgression event, it is possible that the genetic variations from introgression partially  
298 remain in the genome of successive generations of Taishu. Thus, the signature of genetic introgression was  
299 not detected using individual data of whole genome SNPs. According to the preceding analysis, it is  
300 possible that genetic introgression from Anglo-Arabian into Taishu remained in small regions of Taishu  
301 genomes. Therefore, we calculated Patterson's D for each chromosome per sample to detect the signatures

302 of genetic introgression from Anglo-Arabian to Taishu at each chromosome (Fig. 5 and Supplemental  
303 Material S7). The results of the ABBA/BABA tests at the chromosomal level showed negative Patterson's  
304 D for almost all chromosomes when using the SNPs of Taishu and 3 of the native Japanese breeds, without  
305 Yonaguni, as a sister species. However, Patterson's D for chromosomes 21 and 24 were positive in all four  
306 patterns of the ABBA/BABA tests (Fig. 5). This strongly indicated that chromosomes 21 and 24 had  
307 retained the genetic introgression.

308

### 309 **Genetic introgression at chromosomal and regional levels - ABBA/BABA tests for regions** 310 **at Chr 21 and Chr 24 -**

311 It is assumed that because of incomplete genetic recombination after genetic introgression, the signatures  
312 of recent genetic introgression (i.e., during WWII) combined on the each of the chromosomes. To confirm  
313 that the signatures on the each of Chr 21 and Chr 24 combined with each other, we calculated Patterson's D  
314 for Chr 21 and Chr 24 using 10 non-overlapping SNPs (roughly 10 kb regions) sliding window analysis  
315 (Supplemental Material S3, S8 and S9). The regions with positive D were calculated in approximately half  
316 of the chromosomes and were on separate chromosomes.

317

### 318 **Genetic introgression at the locus level - Shared SNPs among 5 Japanese native breeds** 319 **and Anglo-Arabian breed -**

320 We counted shared SNPs between Anglo-Arabian to Taishu as the potential introgressed SNPs. The  
321 number of breed-specific SNPs is shown in Fig. 6. In current Taishu population, 8 504 loci showed  
322 variations. There were 554 loci with Taishu-specific SNPs, which should be retained in conservation plans  
323 for this breed. For SNPs that were shared between Taishu and Anglo-Arabian, there were 961 loci that had  
324 "potential" introgressed SNPs, which could have reduced the frequency of the SNPs in Taishu. Another 6

325 988 loci were considered as ancestral variations, which is a common ancestor of all six breeds in this study  
326 and should be retained as much as possible.

327 The number of Taishu-specific SNPs was almost correlated with the size of the chromosome (All SNPs  
328 =  $31.6 + 2.9 \times$  genome size of each chromosome (Mb),  $R^2 = 0.88$ ,  $SE = 38.6$ ,  $P < 0.001$ ), but the positive  
329 correlation between the potential introgressed SNPs and chromosome size was lower than that for all SNPs  
330 (introgressed SNPs =  $0.37 + 2.5 \times$  genome size of each chromosome (Mb),  $R^2 = 0.68$ ,  $SE = 9.12$ ,  $P <$   
331  $0.001$ ). For example, there were a low number of potential introgressed SNPs on chromosome X, which is  
332 the second longest chromosome in the horse genome (Supplemental Material S4). We counted the number  
333 of “potential” introgression SNPs at 7 loci on chromosome 21 (9.9% of all shared SNPs on Chr 21) and 19  
334 loci on chromosome 24 (38.8% of all shared SNPs on Chr 24). Chromosomes 21 and 24 which were  
335 estimated as introgressed chromosomes by the preceding analysis did not show a substantial number of  
336 shared SNPs more than other chromosomes (Supplemental Material S4).

337

338 **Genetic introgression at the locus level - Shared SNPs between Taishu and Anglo-Arabian**  
339 **on high linkage disequilibrium -**

340 Patterson’s D differed depending on the sister breed of the four Japanese native breeds (Fig. 4 and 5);  
341 therefore, we conducted another test for recent genetic introgression without using the data from the four  
342 Japanese breeds. The genetic introgression from Anglo-Arabian into Taishu occurred relatively recently;  
343 therefore, we expected that recent-introgressed SNPs should be in the genomic regions of high linkage  
344 disequilibrium (high LD). We counted the shared SNPs in the high LD regions. Of the potential  
345 introgressed SNPs, 36 were in high LD regions (10% of all potential introgressed SNPs in >10 kb high LD  
346 regions) in 38 Taishu individuals. The frequency of the potential introgressed SNPs in the high LD regions



347 did not significantly affect the frequency of all SNPs in the high LD regions (2-sample test for equality of  
348 proportions with continuity correction,  $\chi^2 = 2.03$ ,  $df = 1$ ,  $p = 0.154$ ).

349

### 350 **Genetic introgression at the locus level - Genetic diversity of Japanese native horses -**

351 We calculated the nucleotide diversity ( $\pi$ ) of 5 Japanese native horse breeds as the index of genetic  
352 diversity. The nucleotide diversity of Taishu was significantly lower than that of the other breeds (Fig. 7,  
353 Bonferroni-adjusted Welch's *t*-tests,  $p < 0.001$  each). However, the inbreeding coefficient ( $F_{IS}$ ) for Taishu  
354 was not lower than that of other breeds (Supplemental Material S5). Taishu had many unique SNPs (Fig. 6),  
355 but most of them have low frequency in the current population.

356

## 357 **Discussion**

### 358 **Genetic introgression from Anglo-Arabian to Taishu**

359 We conducted the main 8 analyses to confirm genetic introgression from Anglo-Arabian to Taishu and to  
360 estimate genetic diversity of Taishu (Table 1). First, we reconstructed the ML phylogeny by using  
361 ddRAD-seq markers to confirm admixture between Anglo-Arabian population and Taishu population (Fig.  
362 1 and Table 1). All individuals grouped based on the breeds and this clear pattern of phylogeny  
363 corresponded with previous studies (Tozaki et al. 2003). Tozaki et al. (2003) showed that Kiso and  
364 Hokkaido were grouped in a sister clade and that Kiso-Hokkaido clade and Taishu were grouped in a sister  
365 clade. It is reasonable to group Yonaguni and Miyako in a sister clade because their habitats are  
366 geographically very close. Both Yonaguni and Miyako have smaller body sizes compared with other breeds  
367 of Japanese native horses. Thus, we considered that the ML phylogeny by using ddRAD-seq markers is  
368 reliable. The phylogeny showed that Taishu population has sub-populations, and the genetic distances  
369 between Taishu subpopulations were relatively large. One possible cause could be the rapid decrease in

370 population size. Another possible cause could be because of the inconvenience caused by the blockage of  
371 movement between the north and south islands, which may have resulted in the differences in the breeding  
372 populations on Tsushima island . The genetic distances of both subpopulations of Taishu and  
373 Anglo-Arabian were large; therefore, we concluded that this structure was not derived from introgression of  
374 the Anglo-Arabian breed with Taishu. Then, we reconstructed using the phylogeny of 16S rRNA. The 16S  
375 rRNA phylogeny did not reflect the pattern of breeds (Supplemental Material S2) and this concurred with  
376 previous studies that show mtDNA in the horse is highly diverse and does not show the phylogenetic  
377 pattern of breeds in European and Asian horses (Achilli et al. 2012). This indicated that using partial DNA  
378 sequences was not suitable for detecting introgression because they show biased variation in the genomes.  
379 Specific regions of horse genomes have undergone rapid and strong artificial selection while others have  
380 maintained the ancestral variations from before domestication (Achilli et al. 2012).

381 Second, we estimated the migration rate of Anglo-Arabian population to Taishu population by TreeMix  
382 analysis. The results showed that the migration rate was 4 % in the best-explained tree and the assumption  
383 that migration from Anglo-Arabian to Taishu did not dramatically improve the variance in relatedness of  
384 the tree, indicated that almost no introgression from Anglo-Arabian into Taishu remained in the current  
385 population.

386 Then, we conducted STRUCTURE analysis to assess the degree of genetic introgression at individual  
387 level (Fig. 3 and Table 1). The results of STRUCTURE Analysis showed that 10 individuals of all Taishu  
388 individuals comprised 0.1–10 % of the Anglo-Arabian cluster. As this degree of Anglo-Arabian clusters  
389 were detected in individuals in other Japanese native breeds (Fig. 3a and 3b), it is not enough to conclude  
390 that Taishu individuals who comprised the Anglo-Arabian clusters are introgressed individuals.

391 Subsequently, we conducted another analysis, ABBA/BABA test, to assess the degree of genetic  
392 introgression in comparison with 4 other Japanese breeds (Fig. 4 and Table 1). When using the SNPs of

393 Taishu and 3 of the native Japanese breeds, without Yonaguni as a sister species, almost all individuals had  
394 negative Patterson's D, which indicated that the introgression from Anglo-Arabian did not occur in more  
395 than 3 breeds. When Yonaguni and Taishu were included, the results indicated that genetic migration from  
396 Anglo-Arabian into Taishu occurred more often than into Yonaguni. If recent genetic introgression (i.e.,  
397 during WWII) from Anglo-Arabian into Taishu has left a signature in Taishu individuals, then Patterson's  
398 D should be positive when using SNPs of non-introgressed breeds (Miyako and Yonaguni). It is difficult to  
399 conclude the results of ABBA/BABA test. ABBA/BABA test showed positive D when using Yonaguni as  
400 a sister species of Taishu, meaning that genetic introgression from Anglo-Arabian to Taishu was often  
401 more than to Yonaguni; however, ABBA/BABA test showed negative D when using Miyako, meaning  
402 that genetic introgression from Anglo-Arabian to Taishu was not often more than Miyako, even though  
403 both Yonaguni and Miyako were non-introgressed breeds. There are some possible causes of the negative  
404 D when using 3 of the native Japanese breeds, without Yonaguni as a sister species. One possibility could  
405 be that introgression partially remained in the genome of Taishu individuals and another is that the  
406 signatures of introgression was derived from genetic admixture long before genetic introgression during  
407 WWII. Therefore, we calculated Patterson's D for each chromosome per sample (Fig. 5 and Table 1).  
408 Patterson's D for chromosomes 21 and 24 were positive in all four patterns of the ABBA/BABA tests.  
409 These results indicated strongly that chromosomes 21 and 24 had retained the genetic introgression. If the  
410 signatures of genetic introgression on Chr 21 and Chr 24 were derived from the recent genetic introgression,  
411 they must have combined on the each of the chromosomes. To confirm that the signatures on Chr 21 and 24  
412 combined each other, we calculated Patterson's D at region level. Regions with positive Patterson's D were  
413 on separate chromosomes (Supplemental Material S3). The results suggested that the signatures of "recent"  
414 genetic introgression were not found in the current Taishu population.  
415

## 416 **“Recent” genetic introgression from Anglo-Arabian to Taishu**

417 We counted the shared SNPs to assess the genetic introgression at loci level and to confirm the  
418 signatures of genetic introgression were derived from recent genetic introgression during WWII (Fig. 6).  
419 There was a low number of potential introgressed SNPs on chromosome X (Supplemental Material S4).  
420 Although mean values of Patterson’s D at chromosome X were negative, chromosomes 21 and 24 that were  
421 estimated as introgressed chromosomes by the preceding analysis did not show a substantial amount of  
422 shared SNP when compared to other chromosomes (Supplemental Material S4). This suggested that the  
423 estimation of genetic introgression using only the number of shared variations is not completely accurate.  
424 Then, we counted the shared SNPs in the high LD regions because if the genetic introgression from  
425 Anglo-Arabian into Taishu occurred recently, the introgressed SNPs were present in the high LD regions  
426 (Table 1). 36 SNPs were in high LD regions (10% of all shared SNPs) in 38 Taishu individuals. The  
427 frequency of the shared SNPs in the high LD regions did not significantly affect the frequency of all SNPs  
428 in the high LD regions.

429 These results suggested that although the genetic introgression event between Anglo-Arabian and Taishu  
430 was recorded during WWII, the incontestable signatures of the recent genetic introgression on their genome  
431 were not detected in the current Taishu population. Therefore, it is likely that the Taishu population has  
432 undergone a drastic decrease in size with a hard bottleneck, and the introgressed offspring were not  
433 preferred by residents on the Tsushima islands. It is possible that many Anglo-Arabian offspring could not  
434 tolerate the environment on the islands. The number of Taishu individuals on Tsushima island was 2405 in  
435 1952 (Hayashida, 1972); thus, the population has declined to about 1/60 of its former size. Moreover, the  
436 residents of Tsushima island prefer individuals with a smaller body size that are more suitable for  
437 agricultural purposes (Hayashida, 1972). Also, Taishu has been maintained on the island without forage,

438 indicating that Taishu has a higher tolerance to low nutrition (Hayashida, 1972), whereas the offspring of  
439 Anglo-Arabian and Taishu might have weaker resistance.

440

#### 441 **Genetic diversity of Taishu**

442 The nucleotide diversity of Taishu was significantly lower than that of the other breeds (Fig. 7 and Table  
443 1), despite the genetic introgression from Anglo-Arabian, which increased the nucleotide diversity of this  
444 breed. This is consistent with the results of other tests of introgression (Table 1). The inbreeding coefficient  
445 ( $F_{IS}$ ) for Taishu was not higher than that of other breeds (Supplemental Material S5), indicating that the low  
446 nucleotide diversity of Taishu was not due to a failure of recent artificial breeding. There are many unique  
447 SNPs in Taishu (Fig. 6), but they are less frequent in the current population and thus, will be lost. In  
448 general, low genetic diversity affects the long-term potential for survival of populations (Bouzat, 2010),  
449 and individual fitness because of decreased sperm quality (Hedrick and Fredrickson, 2010), reduced litter  
450 size (Hedrick and Fredrickson, 2010), increased mortality of juveniles (RALLS et al. 1988), and increased  
451 susceptibility to diseases and parasites (Coltman et al. 1999). Although Taishu has undergone genetic  
452 introgression from Anglo-Arabian, there were no, or very few, signatures of recent genetic introgression in  
453 the current Taishu population. This suggests that the decrease in genetic diversity is a more urgent issue  
454 than the removal of genetic introgression.

455

#### 456 **The utility of ddRAD-Seq for native livestock**

457 Population genetic approaches using ddRAD-Seq can distinguish the breeds of 5 native Japanese horses  
458 that have few genetic differences and can evaluate the genetic introgression status and genetic diversity of  
459 breeds. In this study, the phylogeny by using ddRAD-seq markers was consistent with the results from

460 Tozaki et al. (2013), suggesting that ddRAD-seq provides reliable data. ddRAD-seq can provide variable  
461 genome wide markers for native livestock that do not have SNP chips or genomic information.

462

463 By applying ddRAD-Seq to native livestock, we could have conducted further downstream analysis.  
464 Genome-wide markers can provide two methods of analysis: all markers together and markers divided into  
465 regions. After several generations, it is possible that the ability to detect introgression is weaker using all  
466 genome-wide markers together, because the introgressed regions represent only parts of the genome. In fact,  
467 the signatures of introgression in Taishu were found at the chromosomal level and not at the individual  
468 level. However, "recent" genetic introgression was not supported by other analyses, and we concluded that  
469 the signatures of introgression reflected events older than the introgression event during WWII. Although  
470 the signatures of recent genetic introgression events were not detected in many of the analyses, many of the  
471 shared SNPs between Taishu and Anglo-Arabian were detected. This indicated that defining genetic  
472 introgression using only shared SNPs might lead to overestimation of genetic introgression, while using an  
473 insufficient number of, and unevenly distributed, markers also carries a risk of misestimation of  
474 introgression. Thus, to detect both the presence and the degree of introgression in native livestock, we need  
475 to use both shared SNPs and population genetic approaches using large numbers of genome-wide markers.

476

#### 477 **Acknowledgments**

478 We thank the conservation organizations of Taishu, Kiso, Miyako, Yonaguni, and Goryo Bokujo in the  
479 imperial household agency for providing samples, Fumie Kobayashi and Satoko Kondo for their help with  
480 the experiments, Naomi Niwa for taking care of paperwork, and Yumie Shinohara for help with all of this  
481 research. Funding: This work was supported by the Research Institute for Food and Agriculture of  
482 Ryukoku University.

483

484

485 **Reference**

- 486 Achilli, A., Olivieri, A., Soares, P., Lancioni, H., Kashani, B.H., Perego, U.A., Nergadze, S.G.,  
487 Carossa, V., Santagostino, M., Capomaccio, S., Felicetti, M., Al-Achkar, W., Penedo, M.C.T.,  
488 Verini-Supplizi, A., Houshmand, M., Woodward, S.R., Semino, O., Silvestrelli, M., Giulotto, E.,  
489 Pereira, L., Bandelt, H.-J., Torroni, A., 2012. Mitochondrial genomes from modern horses reveal the  
490 major haplogroups that underwent domestication. *Proc. Natl. Acad. Sci. USA* 109, 2449–2454. doi:  
491 10.1073/pnas.1111637109  
492 Baird, N.A., Etter, P.D., Atwood, T.S., Currey, M.C., Shiver, A.L., Lewis, Z.A., Selker, E.U., Cresko,  
493 W.A., Johnson, E.A., 2008. Rapid SNP Discovery and Genetic Mapping Using Sequenced RAD  
494 Markers. *PLoS ONE* 3, e3376–7. doi: 10.1371/journal.pone.0003376  
495 Barrett, J.C., 2009. Haploview: Visualization and Analysis of SNP Genotype Data. *Cold Spring Harb.*  
496 *Protoc.* 2009, pdb.ip71–pdb.ip71. doi: 10.1101/pdb.ip71  
497 Blackmon, H., Adams, R.H., Blackmon, M.H., 2013. Package “evobiR.”  
498 Bolger, A.M., Lohse, M., Usadel, B., 2014. Trimmomatic: a flexible trimmer for Illumina sequence  
499 data. *Bioinformatics* 30, 1–7. doi: 10.1093/bioinformatics/btu170  
500 Bouzat, J.L., 2010. Conservation genetics of population bottlenecks: the role of chance, selection, and  
501 history. *Conserv. Genet.* 11, 463–478. doi: 10.1007/s10592-010-0049-0  
502 Bradbury, P.J., Zhang, Z., Kroon, D.E., Casstevens, T.M., Ramdoss, Y., Buckler, E.S., 2007.  
503 TASSEL: Software for association mapping of complex traits in diverse samples. *Bioinformatics*  
504 23:2633-2635.  
505 Browning, B.L., Browning, S.R., 2016. Genotype Imputation with Millions of Reference Samples. *Am.*

506 J. Hum. Genet. 98, 116–126. doi: 10.1016/j.ajhg.2015.11.020

507 Catchen, J., Hohenlohe, P.A., Bassham, S., Amores, A., Cresko, W.A., 2013. Stacks: an analysis tool  
508 set for population genomics. Mol. Ecol. 22, 3124–3140. doi: 10.1111/mec.12354

509 Chattopadhyay, B., Garg, K.M., Kumar, A.K.V., Doss, D.P.S., Rheindt, F.E., Kandula, S.,  
510 Ramakrishnan, U., 2016. Genome-wide data reveal cryptic diversity and genetic introgression in an  
511 Oriental cynopterine fruit bat radiation. BMC Evol. Biol. 16, 41. doi: 10.1186/s12862-016-0599-y

512 Coltman, D.W., Pilkington, J.G., Smith, J.A., Pemberton, J.M., 1999. Parasite-mediated selection  
513 against inbred soay sheep in a free-living island population. Evolution 53, 1259–1267. doi:  
514 10.1111/j.1558-5646.1999.tb04538.x

515 Combosch, D.J., Vollmer, S.V., 2015. Trans-Pacific RAD-Seq population genomics confirms  
516 introgressive hybridization in Eastern Pacific Pocillopora corals. Mol. Phylogenet. Evol. 88, 154–162.  
517 doi: 10.1016/j.ympev.2015.03.022

518 Earl, D.A., vonHoldt, B.M., 2012. STRUCTURE HARVESTER: a website and program for  
519 visualizing STRUCTURE output and implementing the Evanno method. Conserv. Genet. Resour. 4,  
520 359–361. doi: 10.1007/s12686-011-9548-7

521 Evanno, G., Regnaut, S., Goudet, J., 2005. Detecting the number of clusters of individuals using the  
522 software structure: a simulation study. Mol. Ecol. 14, 2611–2620. doi:  
523 10.1111/j.1365-294X.2005.02553.x

524 Fitzpatrick, B.M., Johnson, J.R., Kump, D.K., Smith, J.J., Voss, S.R., Shaffer, H.B., 2010. Rapid  
525 spread of invasive genes into a threatened native species. Proc. Natl. Acad. Sci. USA 107, 3606–3610.  
526 doi: 10.1073/pnas.0911802107

527 Futschik, A., Schlotterer, C., 2010. The Next Generation of Molecular Markers From Massively  
528 Parallel Sequencing of Pooled DNA Samples. Genetics 186, 207–218. doi:



529 10.1534/genetics.110.114397

530 Gabriel, S.B., Schaffner, S.F., Nguyen, H., Moore, J.M., Roy, J., Blumenstiel, B., Higgins, J.,

531 DeFelice, M., Lochner, A., Faggart, M., Liu-Cordero, S.N., Rotimi, C., Adeyemo, A., Cooper, R.,

532 Ward, R., Lander, E.S., Daly, M.J., Altshuler, D., 2002. The Structure of Haplotype Blocks in the

533 Human Genome. *Science* 296, 2225–2229. doi: 10.1126/science.1069424

534 Hanotte, O., Dessie, T., Kemp, S., 2010. Time to Tap Africa’s Livestock Genomes. *Science*

535 1640–1641. doi: 10.1126/science.1186254

536 Hayashida, S., 1972. Native horse in Tsushima island “Taishuba.” Japan Racing Association,

537 Minato-ku.

538 Hedrick, P.W., Fredrickson, R., 2010. Genetic rescue guidelines with examples from Mexican wolves

539 and Florida panthers. *Conserv. Genet.* 11, 615–626. doi: 10.1007/s10592-009-9999-5

540 Larkin, M.A., Blackshields, G., Brown, N.P., Chenna, R., McGettigan, P.A., McWilliam, H., Valentin,

541 F., Wallace, I.M., Wilm, A., Lopez, R., Thompson, J.D., Gibson, T.J., Higgins, D.G., 2007. Clustal W

542 and Clustal X version 2.0. *Bioinformatics* 23, 2947–2948. doi: 10.1093/bioinformatics/btm404

543 Mardis, E.R., 2008. Next-Generation DNA Sequencing Methods. *Annu. Rev. Genom. Human Genet.*

544 9, 387–402. doi: 10.1146/annurev.genom.9.081307.164359

545 McCue, M.E., Bannasch, D.L., Petersen, J.L., Gurr, J., Bailey, E., Binns, M.M., Distl, O., Guérin, G.,

546 Hasegawa, T., Hill, E.W., Leeb, T., Lindgren, G., Penedo, M.C.T., Røed, K.H., Ryder, O.A.,

547 Swinburne, J.E., Tozaki, T., Valberg, S.J., Vaudin, M., Lindblad-Toh, K., Wade, C.M., Mickelson,

548 J.R., 2012. A High Density SNP Array for the Domestic Horse and Extant Perissodactyla: Utility for

549 Association Mapping, Genetic Diversity, and Phylogeny Studies. *PLoS Genet.* 8, e1002451–14. doi:

550 10.1371/journal.pgen.1002451

551 Nielsen, R., Paul, J.S., Albrechtsen, A., Song, Y.S., 2011. Genotype and SNP calling from

- 552 next-generation sequencing data. *Nat. Rev. Genet.* 12, 443–451. doi: 10.1038/nrg2986
- 553 Peterson, B.K., Weber, J.N., Kay, E.H., Fisher, H.S., Hoekstra, H.E., 2012. Double Digest RADseq:  
554 An Inexpensive Method for De Novo SNP Discovery and Genotyping in Model and Non-Model  
555 Species. *PLoS ONE* 7, e37135–11. doi: 10.1371/journal.pone.0037135
- 556 Pickrell, J.K., Pritchard, J.K., 2012. Inference of Population Splits and Mixtures from Genome-Wide  
557 Allele Frequency Data. *PLoS Genet.* 8, e1002967. doi: 10.1371/journal.pgen.1002967
- 558 Poland, J.A., Rife, T.W., 2012. Genotyping-by-Sequencing for Plant Breeding and Genetics. *Plant*  
559 *Genome* 5, 92–111. doi: 10.3835/plantgenome2012.05.0005
- 560 Pritchard, J.K., Stephens, M., Donnelly, P., 2000. Inference of Population Structure Using Multilocus  
561 Genotype Data. *Genetics* 155, 945–959. doi: 10.1016/0379-0738(94)90222-4
- 562 Ralls, K., Ballou, J.D., Templeton, A., 1988. Estimates of Lethal Equivalents and the Cost of  
563 Inbreeding in Mammals. *Conserv.Biol.* 2, 185–193. doi: 10.1111/j.1523-1739.1988.tb00169.x
- 564 Ramasamy, R.K., Ramasamy, S., Bindroo, B.B., Naik, V.G., 2014. STRUCTURE PLOT: a program  
565 for drawing elegant STRUCTURE bar plots in user friendly interface. *SpringerPlus* 3, 431.
- 566 Green, R.E., Krause, J., Briggs, A.W., Maricic, T., Stenzel, U., Kircher, M., Patterson, N., Li, H., Zhai,  
567 W., Fritz, M.H.Y., Hansen, N.F., 2010. A Draft Sequence of the Neandertal Genome. *Science* 328,  
568 710–722.
- 569 Rischkowsky, B., Pilling, D., 2007. The State of the World's Animal Genetic Resources for Food and  
570 Agriculture. *Food & Agriculture Org.*; 2007.
- 571 Ryan, M.E., Johnson, J.R., Fitzpatrick, B.M., 2009. Invasive hybrid tiger salamander genotypes impact  
572 native amphibians. *Proc. Natl. Acad. Sci. USA* 106, 11166–11171. doi:10.1073/pnas.0902252106
- 573 Schaefer, R.J., Schubert, M., Bailey, E., Bannasch, D.L., Barrey, E., Bar-Gal, G.K., Brem, G., Brooks,  
574 S.A., Distl, O., Fries, R., Finno, C.J., Gerber, V., Haase, B., Jagannathan, V., Kalbfleisch, T., Leeb, T.,

575 Lindgren, G., Lopes, M.S., Mach, N., da Câmara Machado, A., MacLeod, J.N., McCoy, A., Metzger,  
576 J., Penedo, C., Polani, S., Rieder, S., Tammen, I., Tetens, J., Thaller, G., Verini-Supplizi, A., Wade,  
577 C.M., Wallner, B., Orlando, L., Mickelson, J.R., McCue, M.E., 2017. Developing a 670k genotyping  
578 array to tag ~2M SNPs across 24 horse breeds. BMC Genomics 18, 565.  
579 doi:10.1186/s12864-017-3943-8

580 Scherf, B.D., Pilling, D., 2015. The Second Report on the State of the World's Animal Genetic  
581 Resources for Food and Agriculture.

582 Stamatakis, A., 2014. RAxML version 8: a tool for phylogenetic analysis and post-analysis of large  
583 phylogenies. Bioinformatics 30, 1312–1313. doi:10.1093/bioinformatics/btu033

584 Tozaki, T., Takezaki, N., Hasegawa, T., Ishida, N., Kurosawa, M., Tomita, M., Saitou, N., Mukoyama,  
585 H., 2003. Microsatellite Variation in Japanese and Asian Horses and Their Phylogenetic Relationship  
586 Using a European Horse Outgroup. J. Hered. 94, 374–380. doi:10.1093/jhered/esg079

587 Yasugi, M., Tezuka, A., Nagano, A.J., 2018. Stacksbinder: online tool for visualizing and  
588 summarizing Stacks output to aid filtering of SNPs identified using RAD sequencing.  
589 Conserv Genet Resour <https://doi.org/10.1007/s12686-018-1050-z>

590 **Tables**591 **Table 1. The summary of the analysis and the results in this study.**

| Method                                                       | Software                                  | Purpose in this study                                                                                       | Result                                                                                                 |
|--------------------------------------------------------------|-------------------------------------------|-------------------------------------------------------------------------------------------------------------|--------------------------------------------------------------------------------------------------------|
| Reconstructing phylogenies with ML                           | RAXML<br>(Stamatakis, 2014)               | To confirm admixture between Anglo-Arabian and Taishu populations                                           | Taishu and Anglo-Arabian did not construct the same cluster                                            |
| The inference of patterns of population splitting and mixing | TreeMix<br>(Pickrell and Pritchard, 2012) | To estimate migration rate from Anglo-Arabian population to Taishu population                               | 4 %, but the assumption of migration does not improve the variance in relatedness of the tree          |
| Model-based clustering of individuals                        | STRUCTURE<br>(Pritchard et al. 2000)      | To estimate the degree of genetic introgression from Anglo-Arabian to Taishu in each individual             | Some individuals comprised 0.1-10% of the Anglo-Arabian cluster                                        |
| ABBA/BABA test for individuals                               | evobiR<br>(Blackmon et al. 2013)          | To confirm genetic introgression from Anglo-Arabian to Taishu in each individual compared with other breeds | Almost all individuals showed negative D                                                               |
| ABBA/BABA test for chromosomes                               | evobiR<br>(Blackmon et al. 2013)          | To confirm introgression from Anglo-Arabian to Taishu at each chromosome                                    | Chr 21 and 24 showed positive D                                                                        |
| ABBA/BABA test for regions in Chr 21 and Chr 24              | evobiR<br>(Blackmon et al. 2013)          | To confirm the “recent “genetic introgression from Anglo-Arabian to Taishu                                  | Positive D regions were separated on the chromosomes                                                   |
| Shared SNPs on High Linkage disequilibrium                   | Haploview<br>(Barrett, 2009)              | To detect shared SNPs between Anglo-Arabian and Taishu on High LD                                           | 36 SNPs were detected and did not significantly different a prediction by random distribution of SNPs. |

|                      |                                  |                                                                  |                                       |
|----------------------|----------------------------------|------------------------------------------------------------------|---------------------------------------|
| Nucleotide diversity | Tassel<br>(Bradbury et al. 2007) | regions<br>To estimate genetic diversity of Taishu<br>population | Lower than all Japanese native breeds |
|----------------------|----------------------------------|------------------------------------------------------------------|---------------------------------------|

---

592 **Figure legends**

593 **Fig. 1. Phylogeny of 5 Japanese horse breeds and Anglo-Arabian.** Maximum Likelihood phylogeny of  
594 genome-wide SNPs. The color boxes represent different breeds. Green, purple, yellow, orange, blue, and  
595 gray represent Kiso, Hokkaido, Yonaguni, Miyako, Taishu, and Anglo-Arabian, respectively.

596

597 **Fig. 2. Results of TreeMix analysis of 6 Japanese native horse breeds.** Maximum-likelihood trees and  
598 the matrices of pairwise residuals for a model allowing (a) 0 migration events and (b) 1 migration event  
599 from Anglo-Arabian to Taishu. We estimated that the current Taishu population would have 4% of their  
600 ancestry from Anglo-Arabian. Large positive values in the residual matrix indicate a poor fit for the  
601 respective pair of populations. Edges representing mixture events are colored according to the weight of the  
602 inferred edge.

603

604 **Fig. 3. Genetic clustering using STRUCTURE with an admixture model.** (a) Structure results for 5  
605 Japanese horse breeds and Anglo-Arabian from  $K = 2$  to 6. (b) Structure results for Taishu and  
606 Anglo-Arabian from  $K = 2$  and  $K = 3$ .

607

608 **Fig. 4. Patterson's D statistic to test for genetic introgression at the individual level.** Positive values  
609 indicate gene flow from Anglo-Arabian into Taishu, while negative values indicate gene flow from  
610 Anglo-Arabian to other Japanese native breeds. Exact values are shown in Supplemental Material S6.

611

612 **Fig. 5. Patterson's D statistic to test for genetic introgression at the chromosome and region levels.**

613 Patterson's D statistics for each chromosome. Red triangles indicated mean  $D > 0$  among four patterns of  
614 ABBA/BABA tests. Black circles, black bars, and gray circles indicated mean, median, and outliers of D,  
615 respectively.

616

617 **Fig. 6. SNP configurations.** SNPs of Taishu, non-introgressed breeds (including Miyako and Yonaguni),  
618 introgressed breeds (including Kiso and Hokkaido), and Anglo-Arabian are represented by blue, yellow,  
619 green, and grey, respectively.

620

621 **Fig. 7. Boxplot of genetic diversity of 5 Japanese native horse breeds.** Nucleotide diversity ( $\pi$ ) of 5  
622 Japanese native horse breeds. Nucleotide diversity of Taishu ( $n = 38$ , mean = 0.3075) was significantly  
623 lower than that of the other breeds (Miyako:  $n = 9$ , mean = 0.3598; Yonaguni:  $n = 5$ , mean = 0.4133; Kiso:  
624  $n = 5$ , mean = 0.4134; Hokkaido:  $n = 6$ , mean = 0.3733).

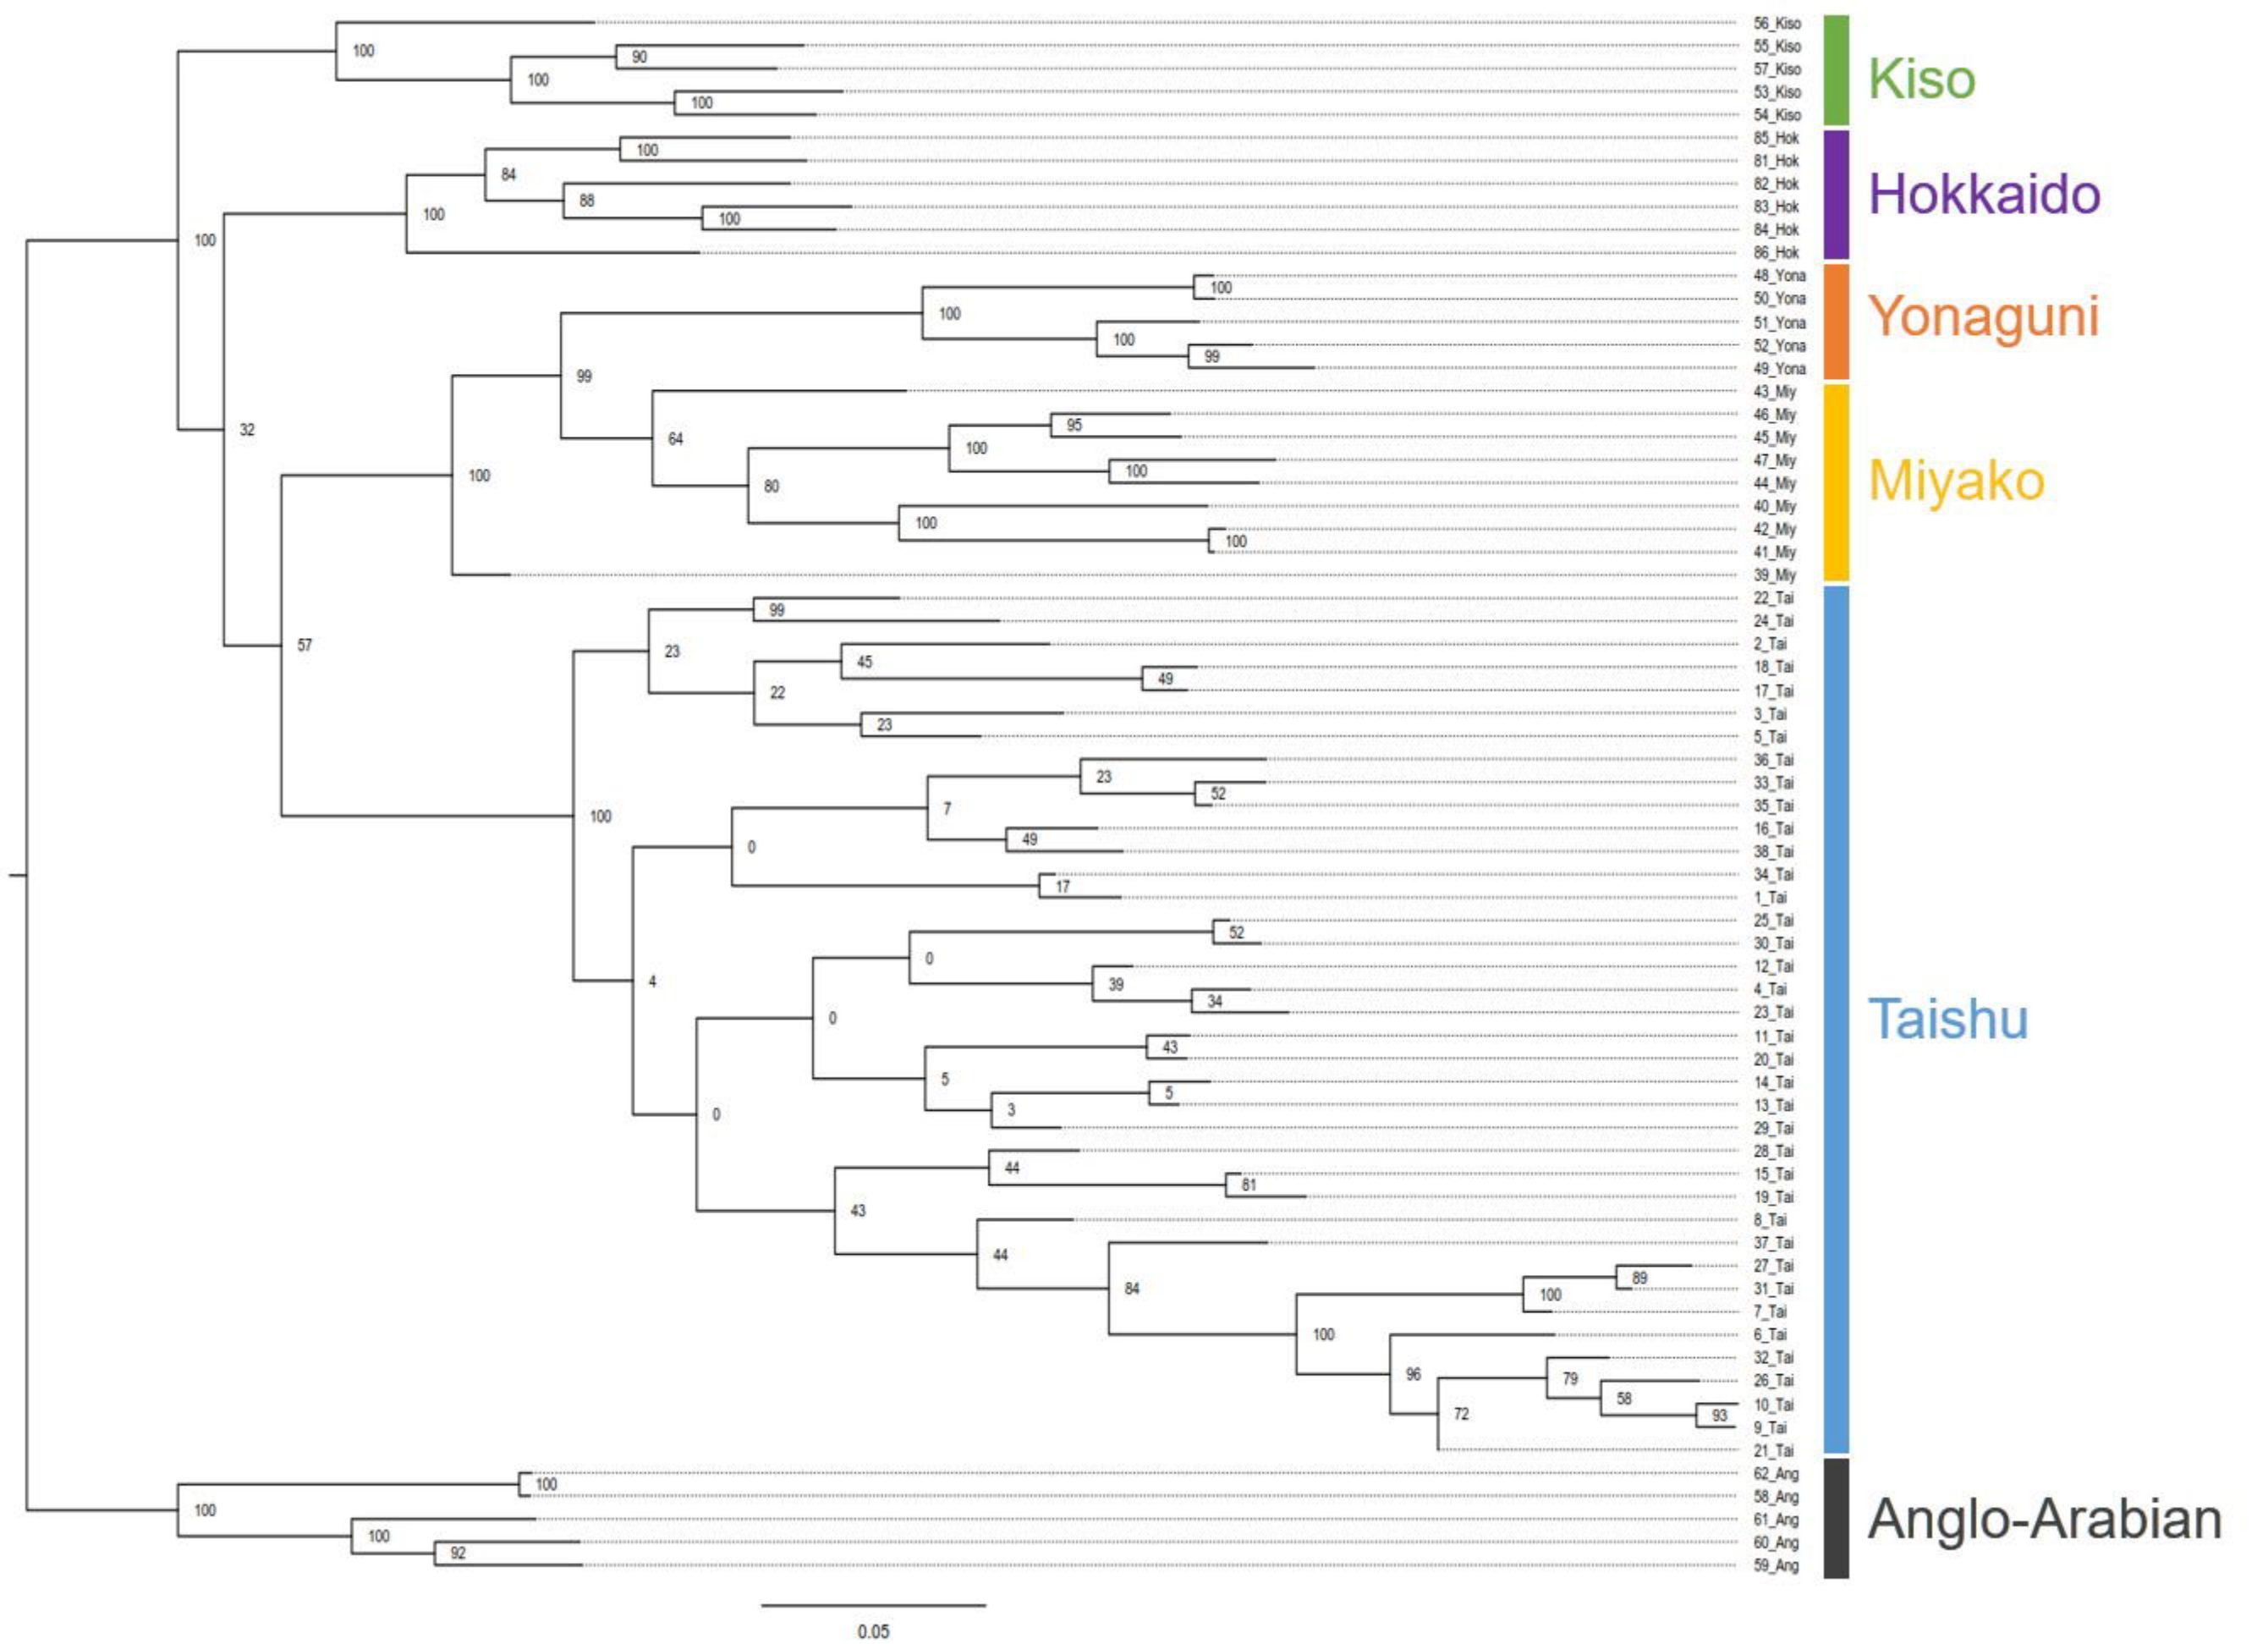



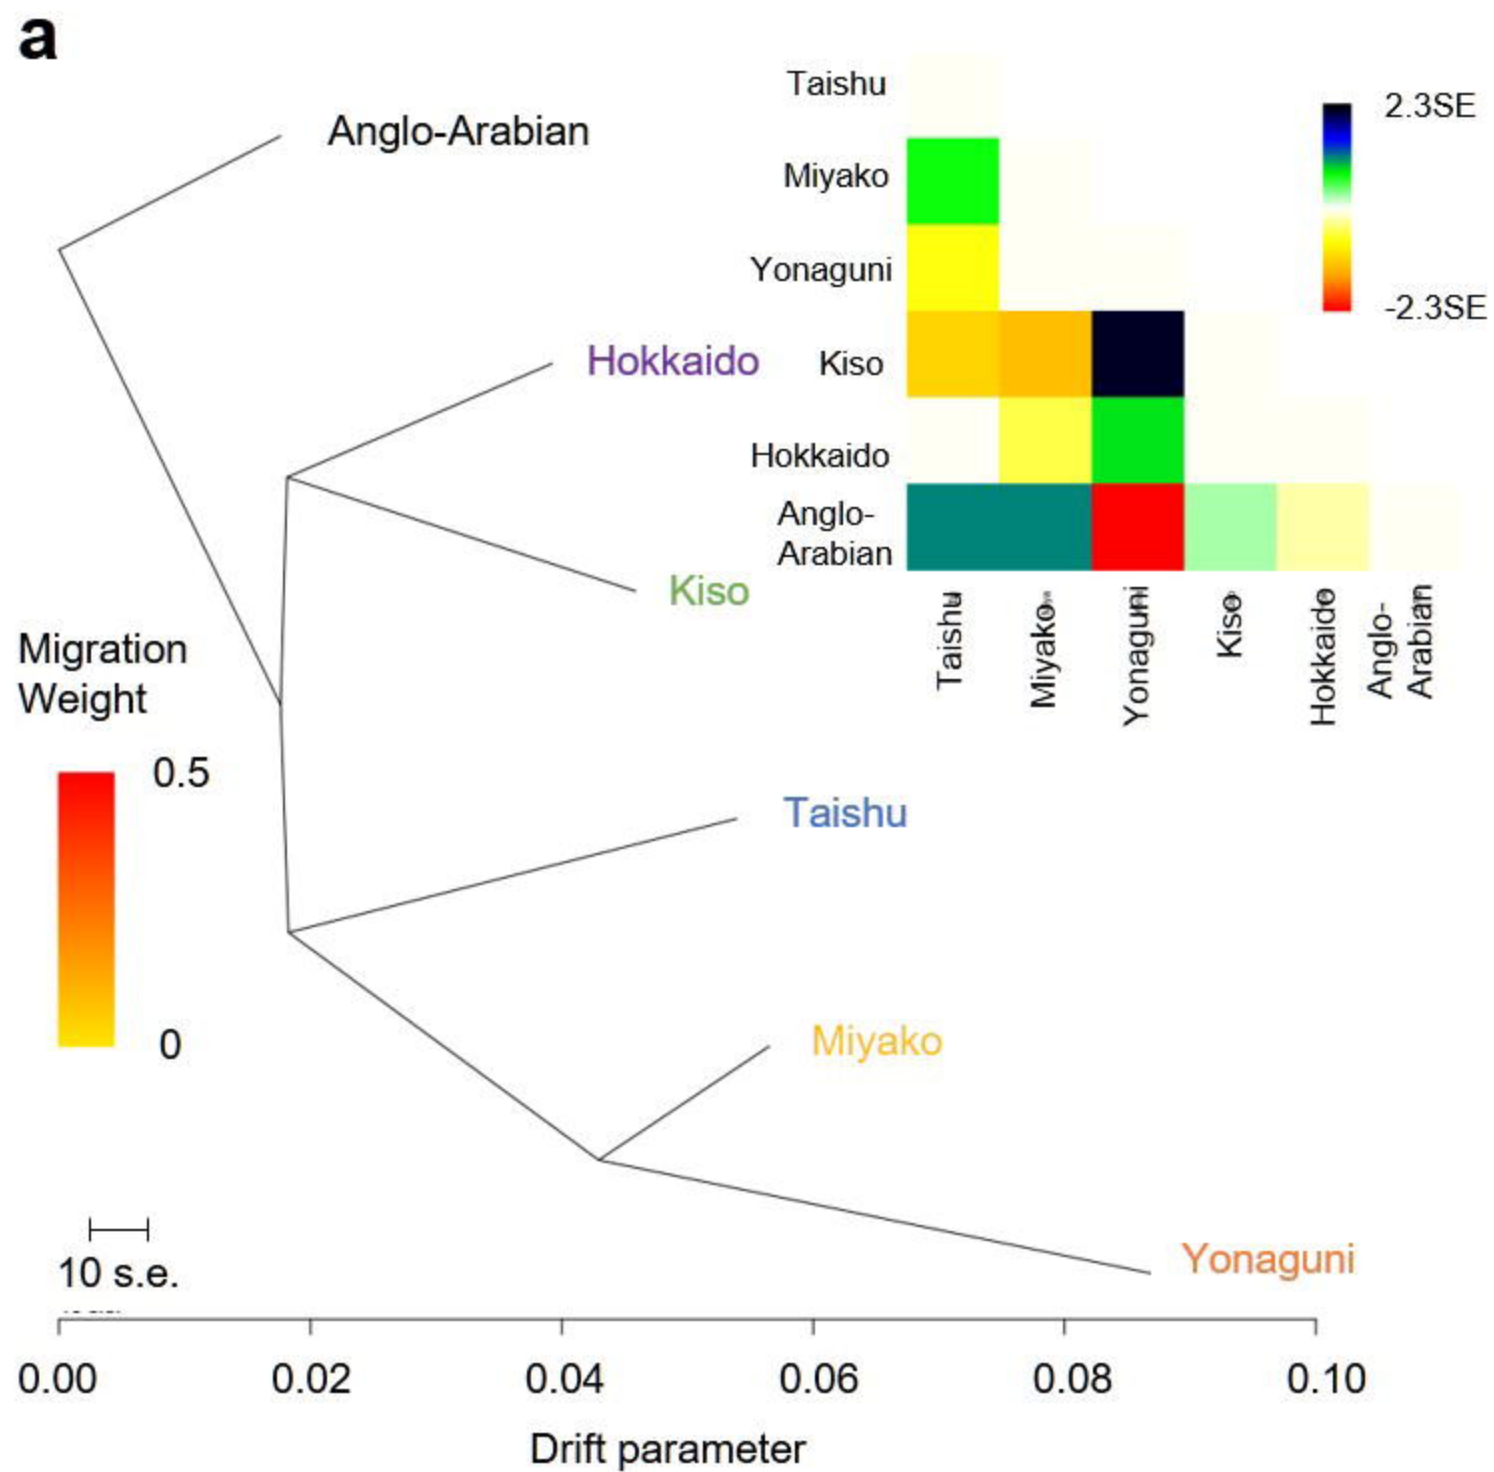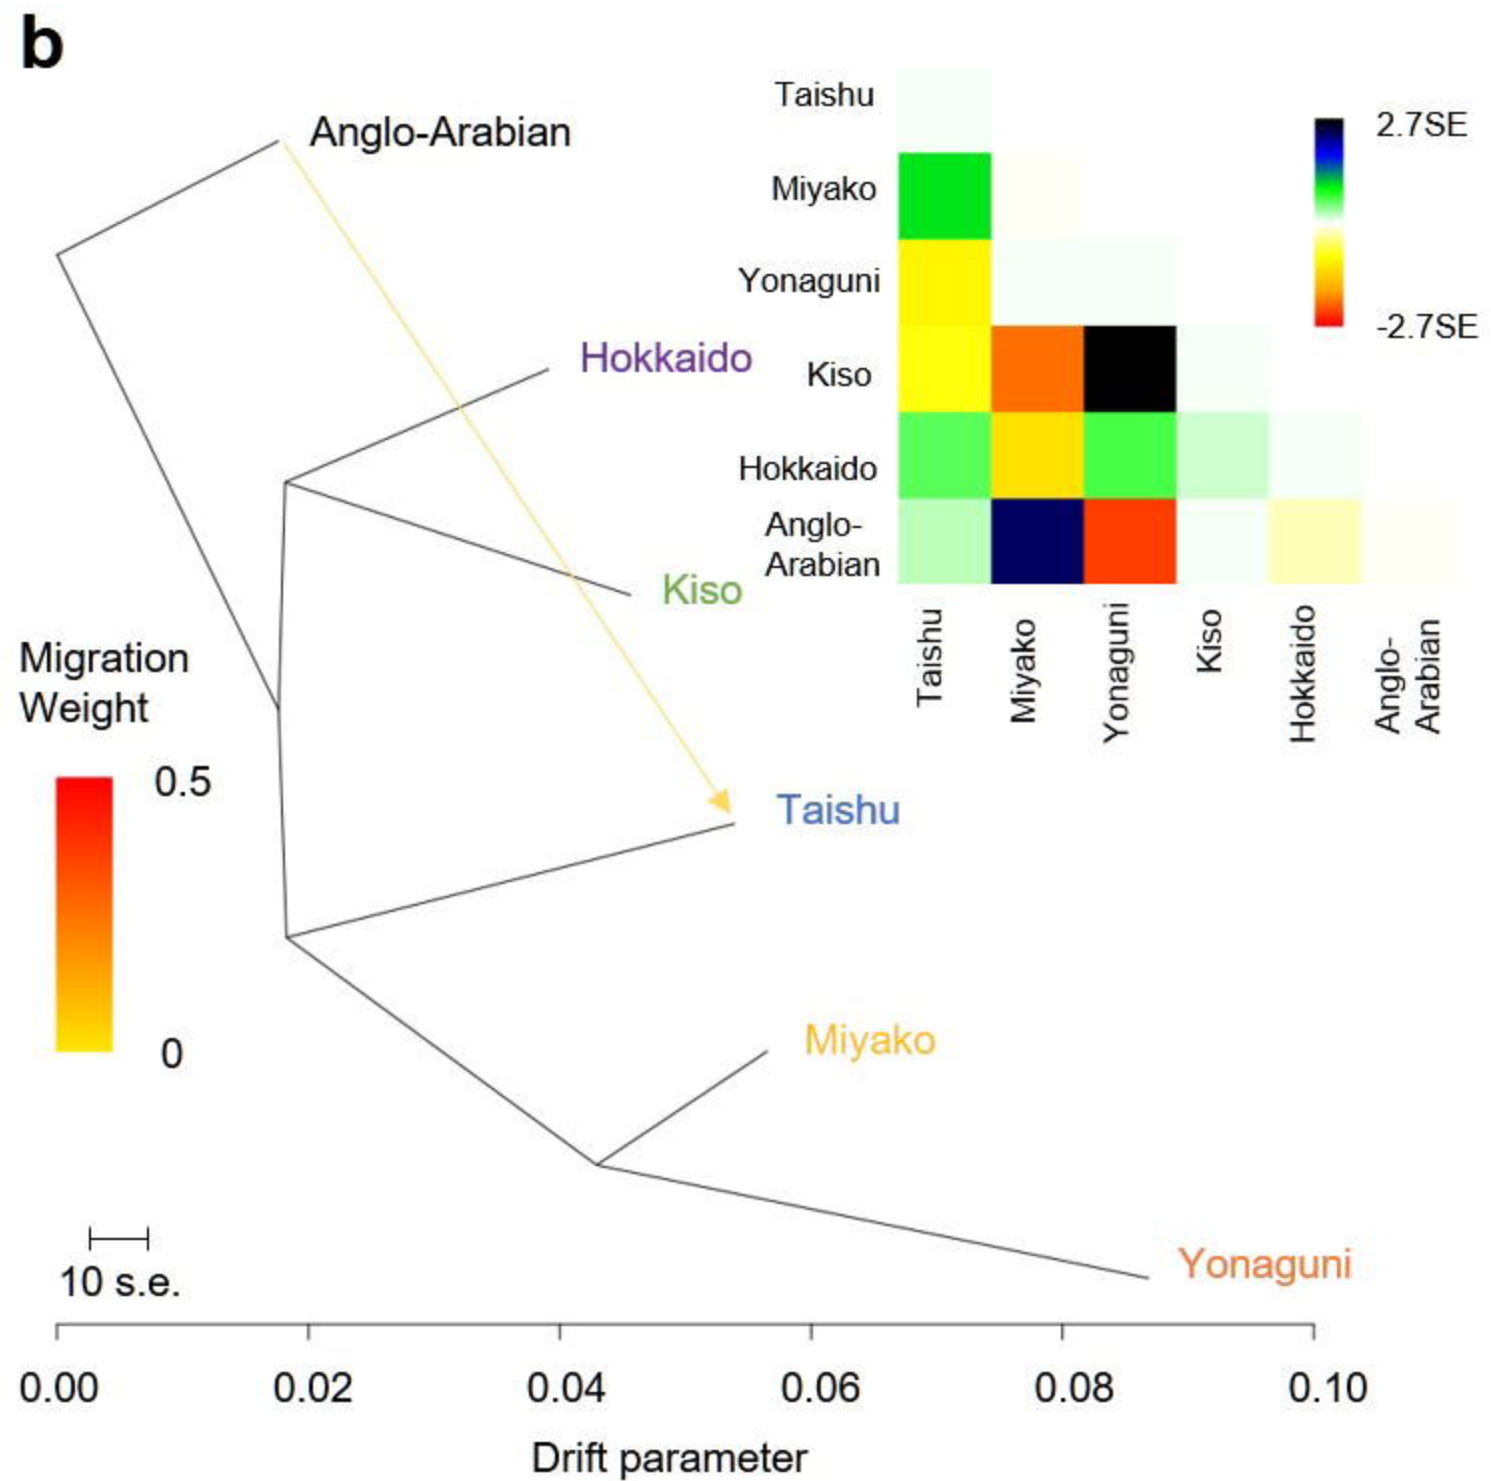

**a**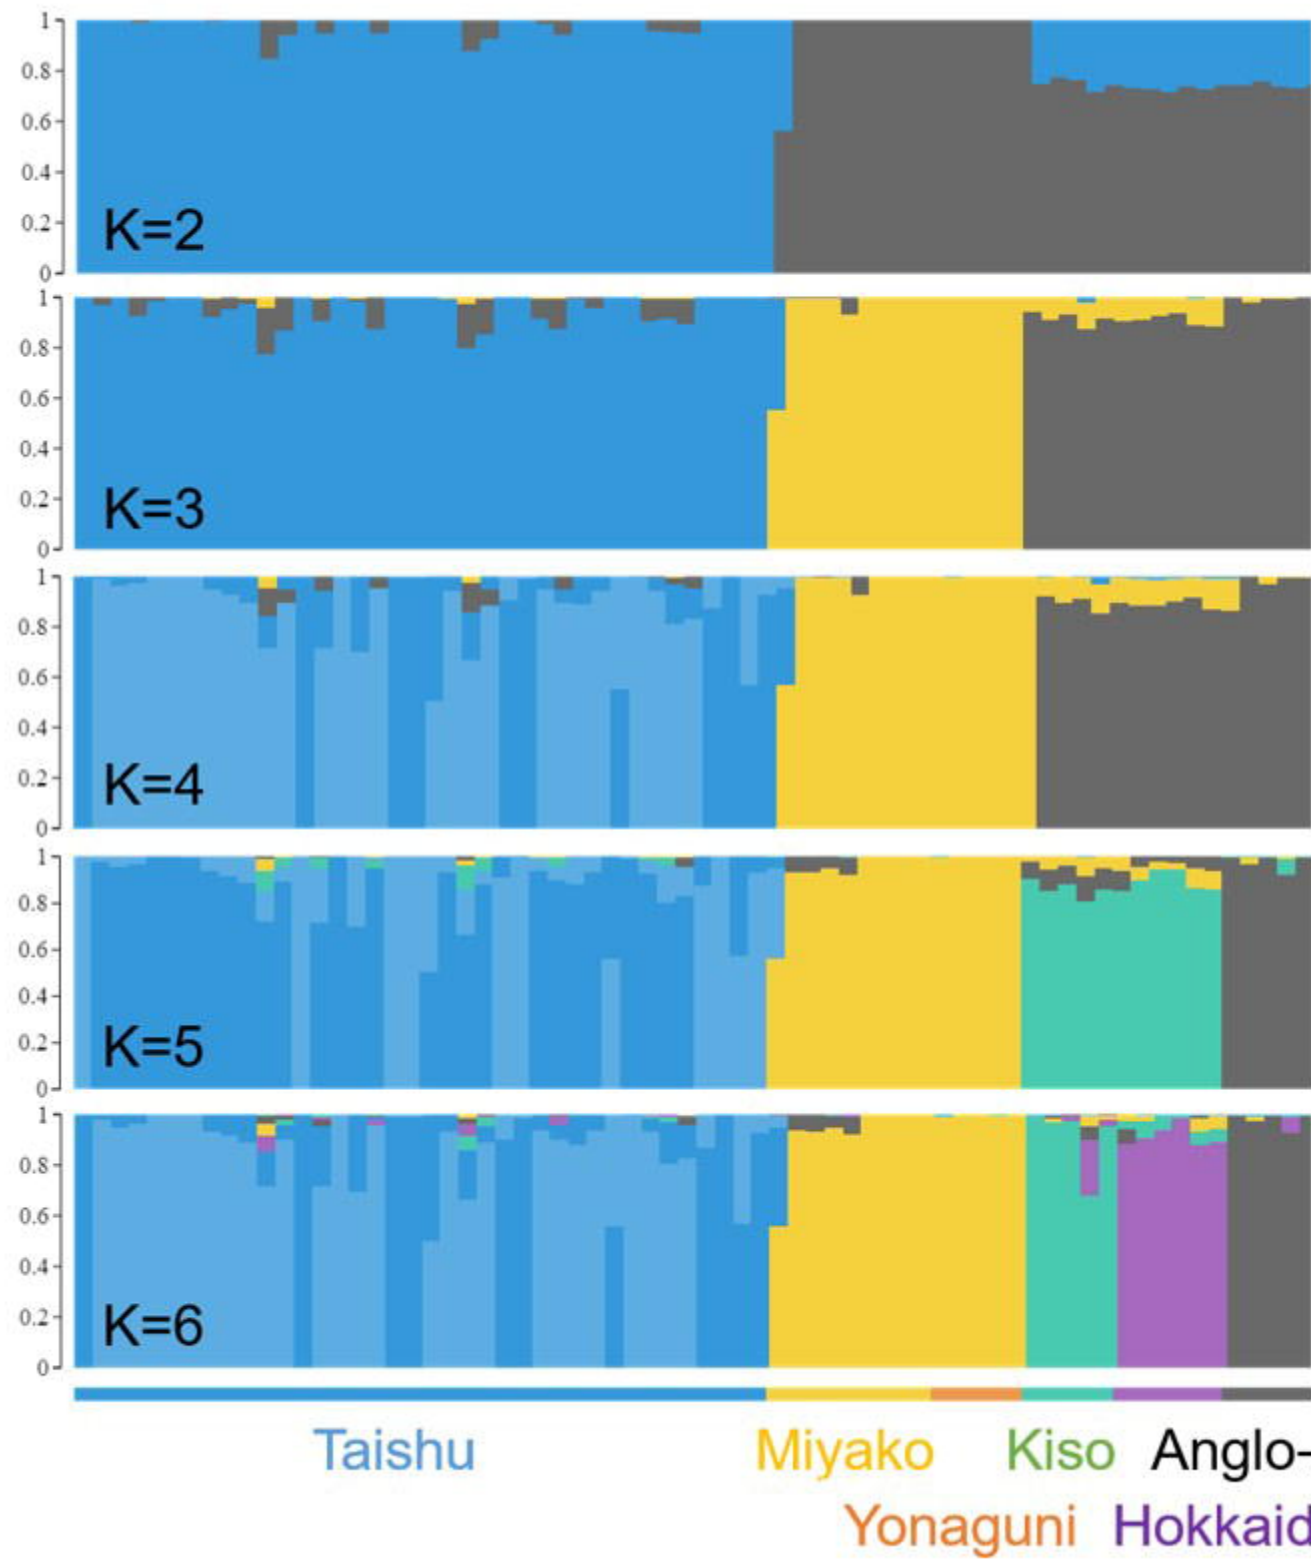**b**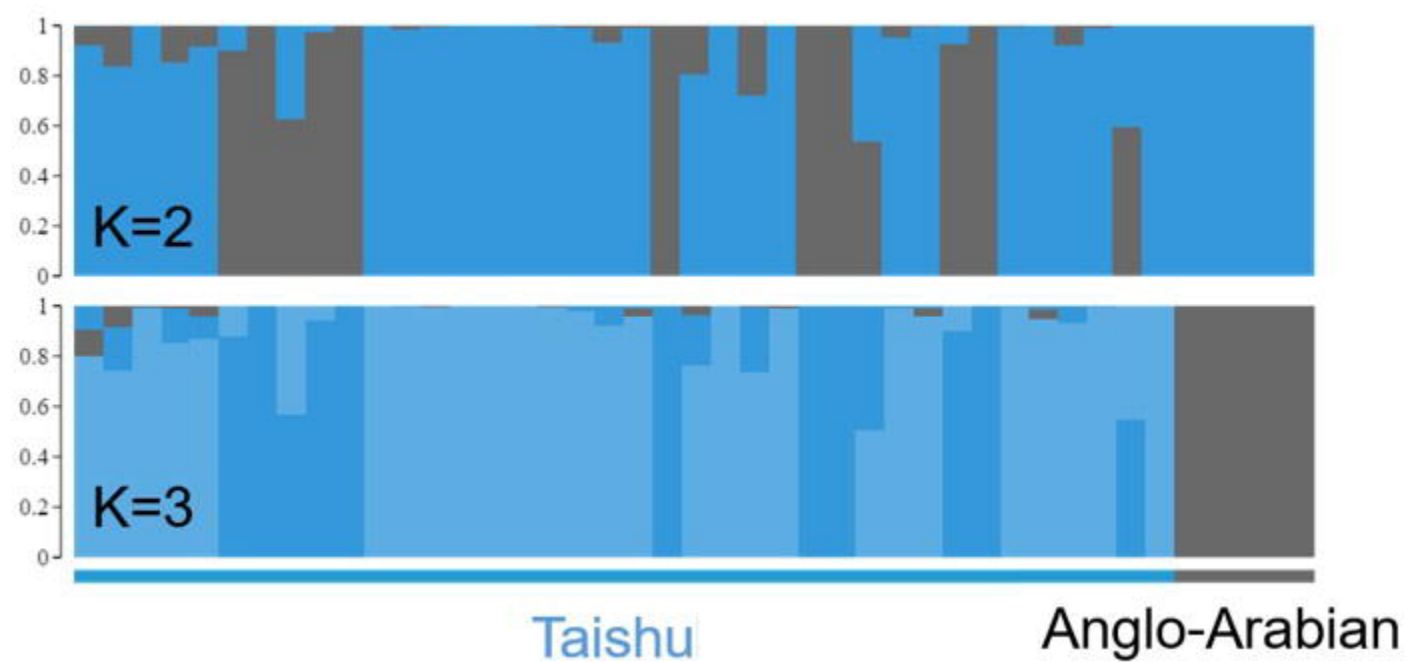

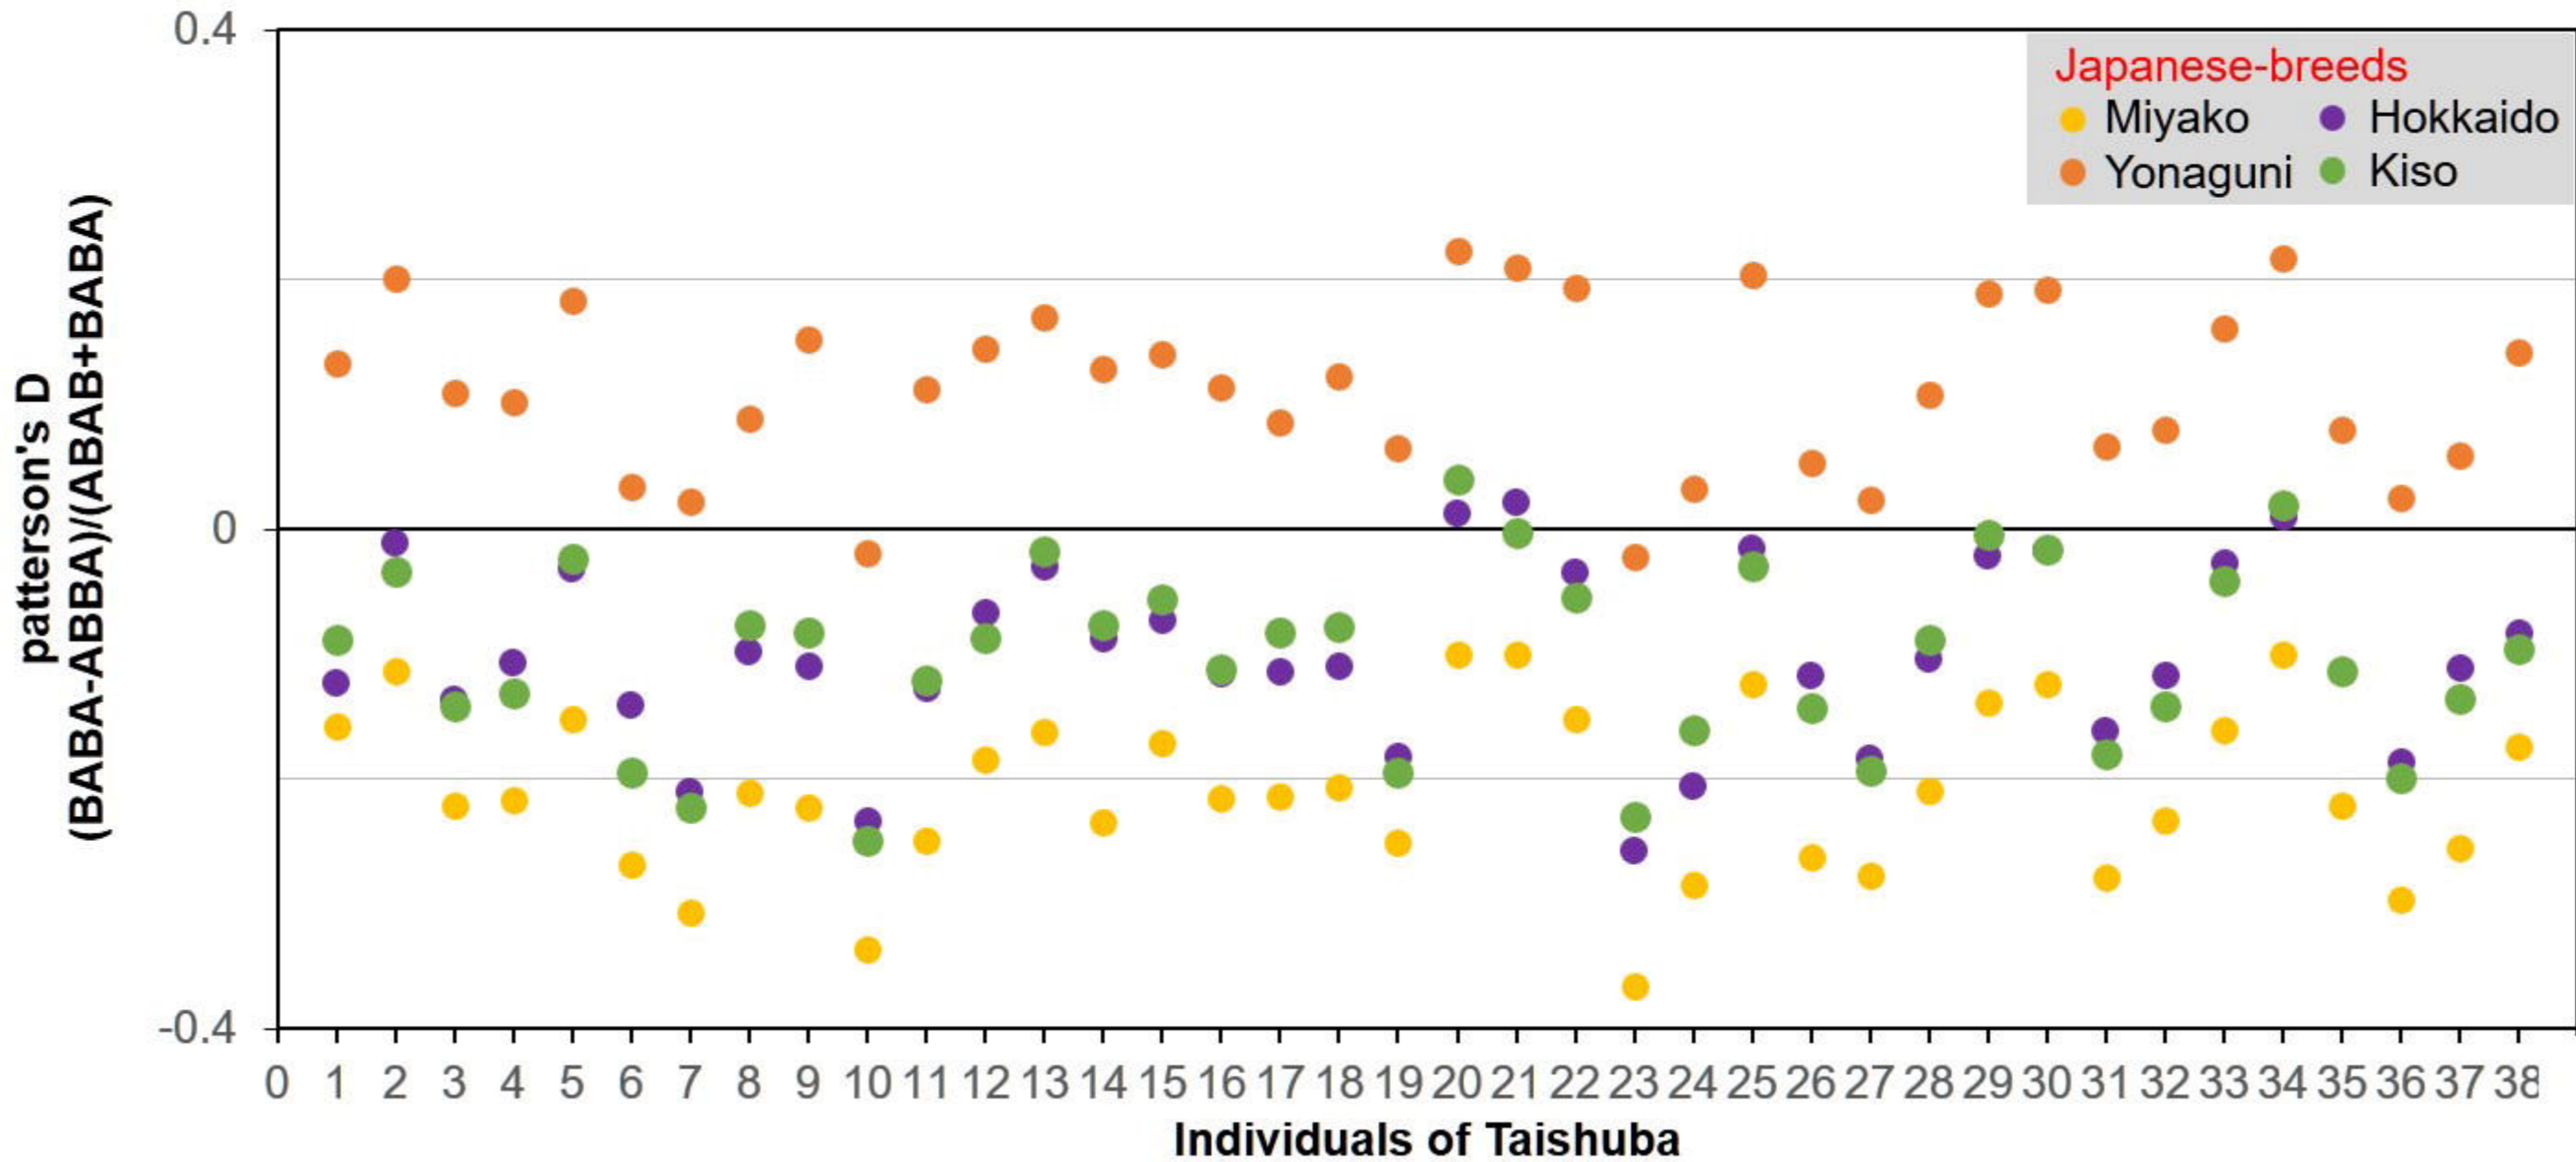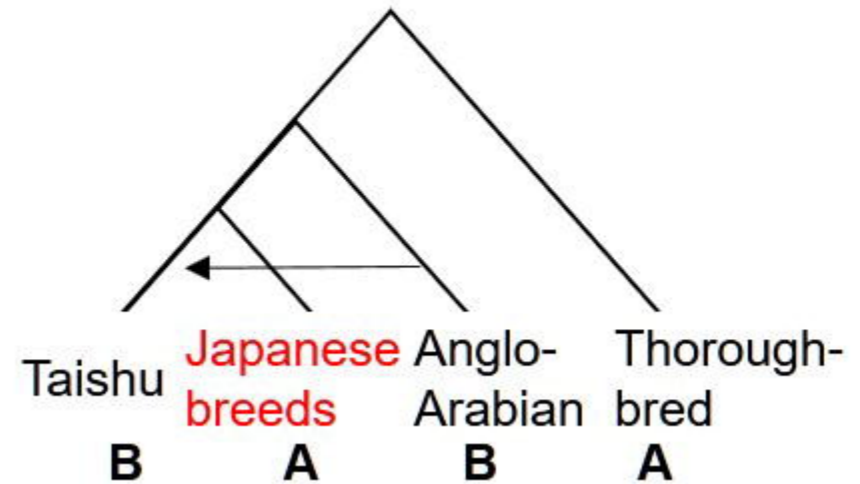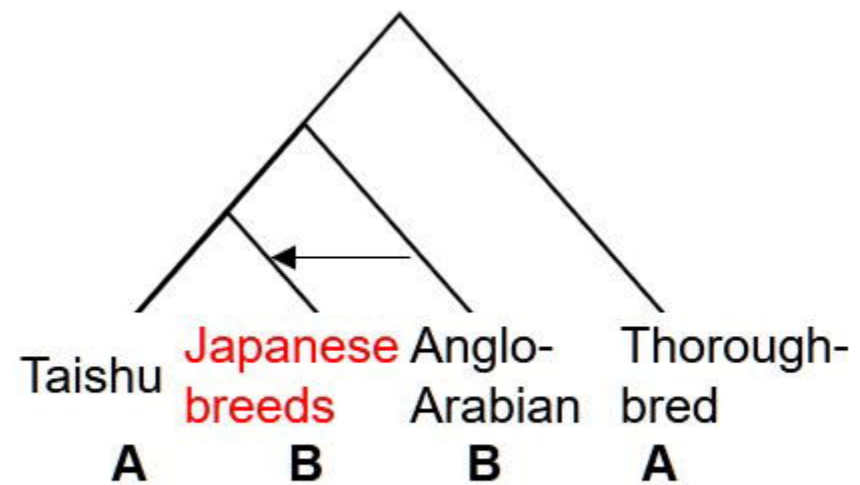

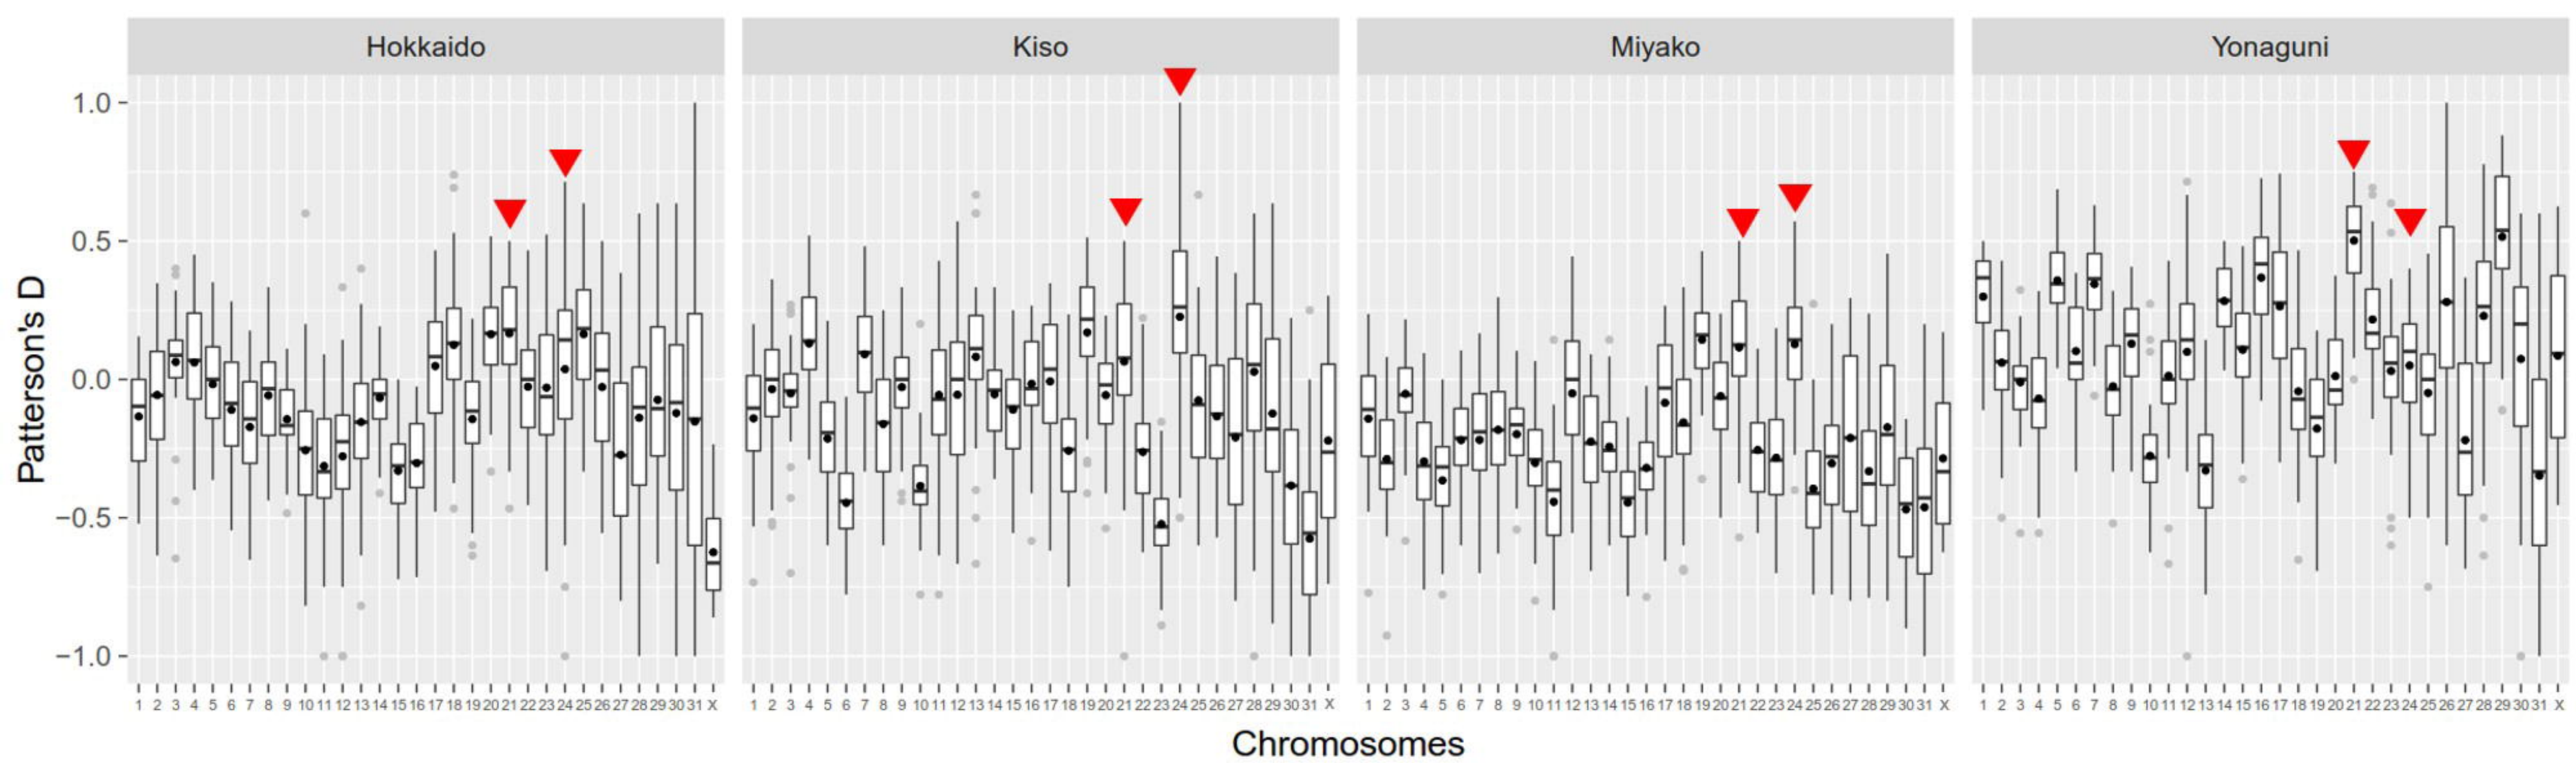

Taishu

Non-introgressed  
(Miyako and Yonaguni)

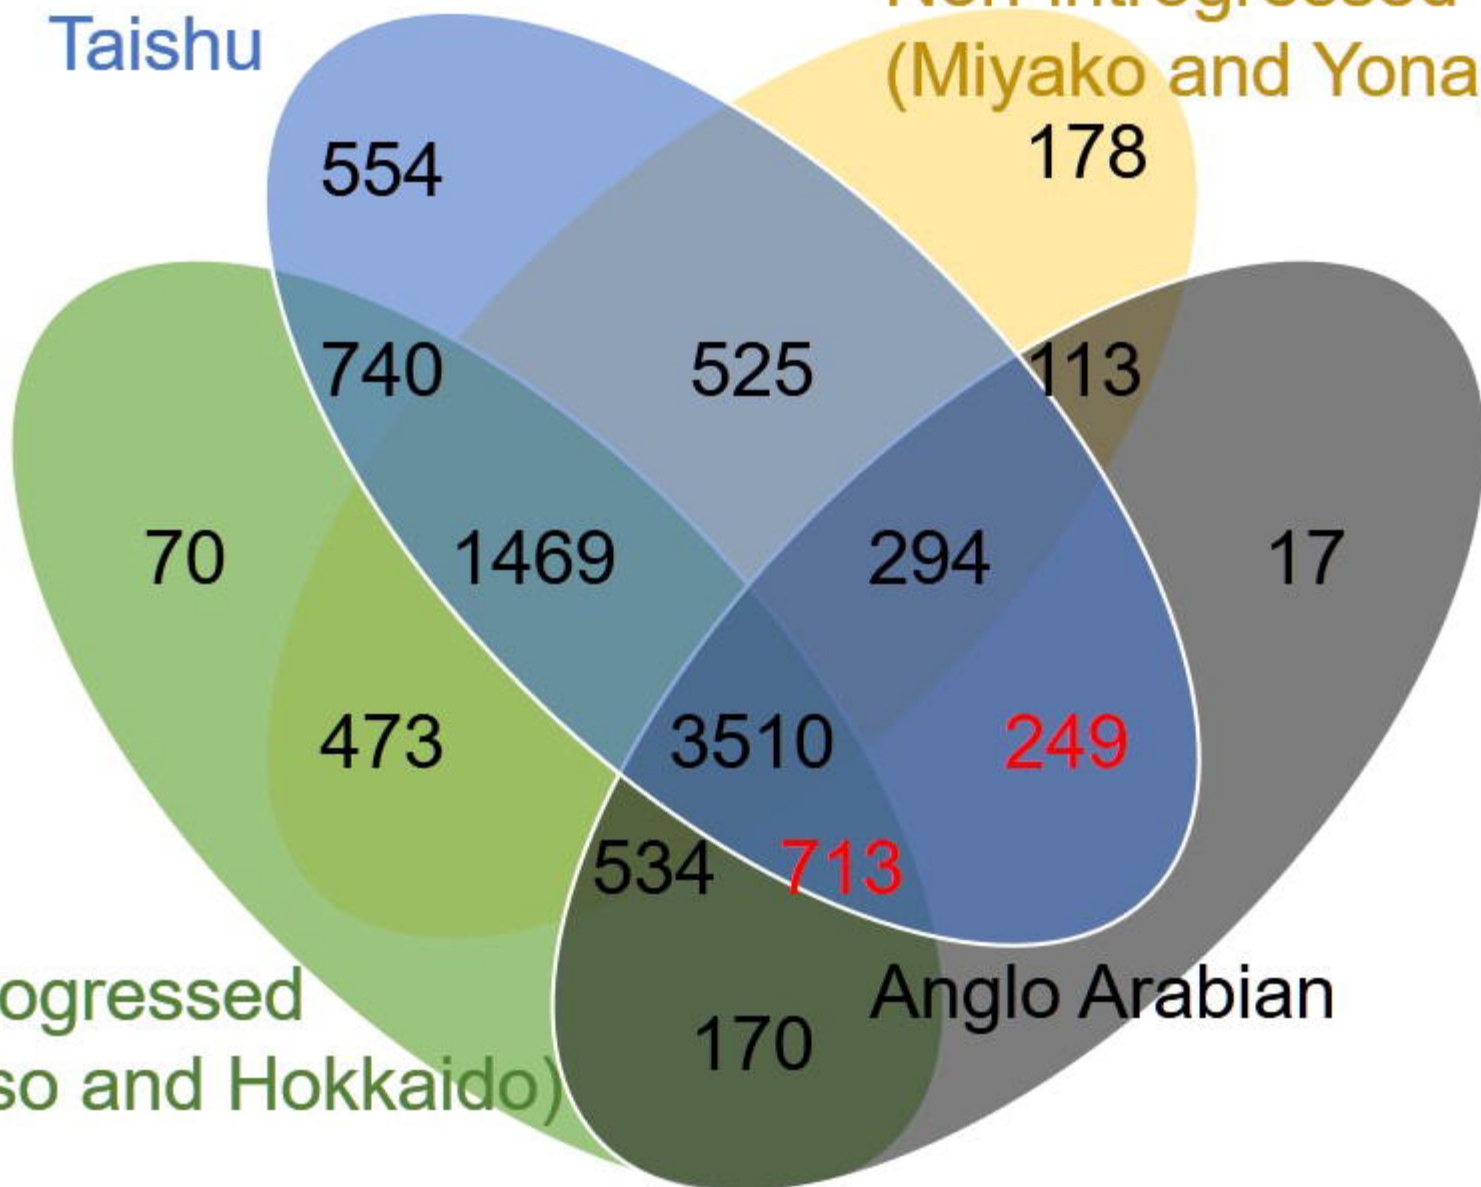

70

554

740

473

1469

525

3510

534

170

294

249

713

178

113

17

Introgressed  
(Kiso and Hokkaido)

Anglo Arabian

Genetic diversity (pai)

1.00  
0.75  
0.50  
0.25  
0.00

Taishu

Miyako

Yonaguni

Kiso

Hokkaido

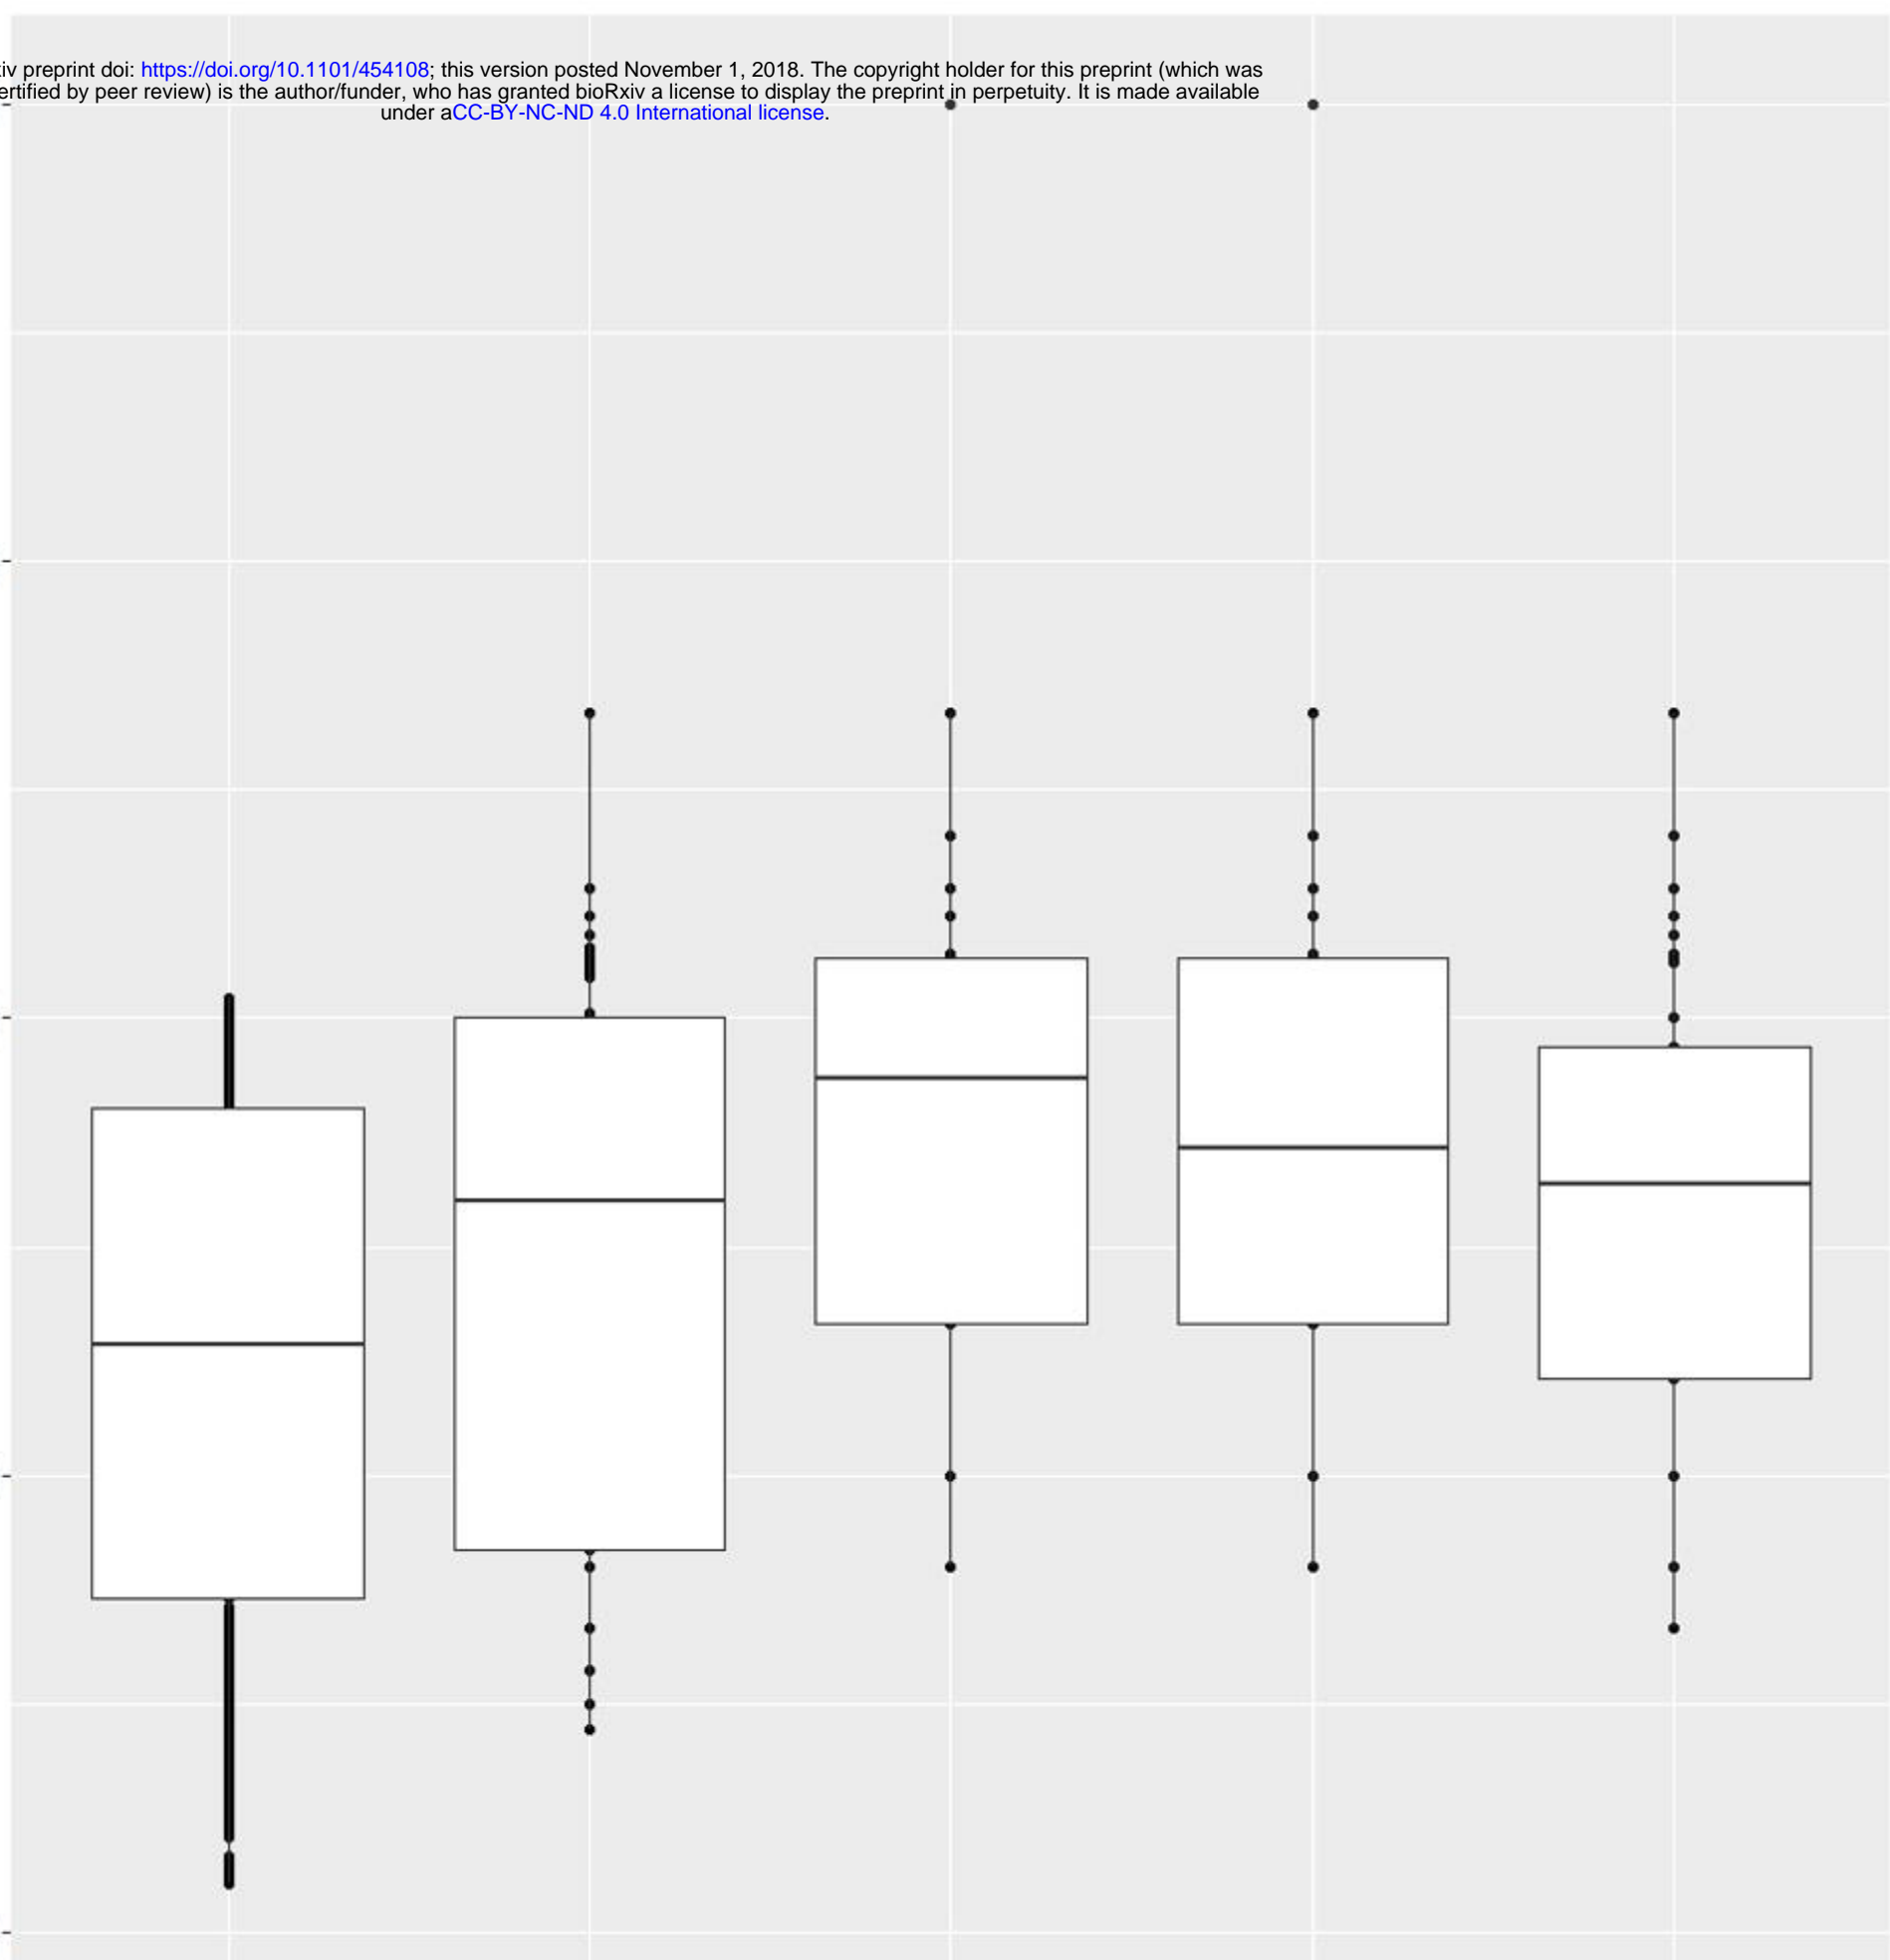

Source: http://biorxiv.org/content/10.1101/454108v1.full.pdf
